# Supplementary material for: Enantio- and regioselective ene-reductions using F420H2-dependent enzymes
Source: Royal Society of Chemistry journal article supplement (doi:10.1039/c8cc04449j), 2018-01-01
Supplement: c8cc04449j1.pdf [file c8cc04449j1.pdf]

## Supporting Information

### Enantio- and regioselective *ene* reductions using $F_{420}H_2$ dependent enzymes

Sam Mathew<sup>+</sup>, Milos Trajkovic<sup>+</sup>, Hemant Kumar, Quoc-Thai Nguyen, Marco W. Fraaije\*

Sam Mathew<sup>[+]</sup>, Milos Trajkovic<sup>[+]</sup>, Hemant Kumar, Quoc-Thai Nguyen, Marco W. Fraaije. Molecular Enzymology Group, University of Groningen, Nijenborgh 4, 9747 AG Groningen (The Netherlands)

Quoc-Thai Nguyen. Faculty of Pharmacy, University of Medicine and Pharmacy, Ho Chi Minh City, 41 Dinh Tien Hoang Street, Ben Nghe Ward, District 1, Ho Chi Minh City (Vietnam)

## Contents

|                                                                                                |    |
|------------------------------------------------------------------------------------------------|----|
| Codon optimized nucleotide sequence of FDR from <i>Mycobacterium hassiacum</i> (FDR-Mha) ..... | 3  |
| Primers used for amplifying FDR-Rh1 and FDR-Rh2.....                                           | 3  |
| Cloning, expression and purification of FDRs .....                                             | 4  |
| Synthesis of substrates and products .....                                                     | 9  |
| Enzymatic reaction of substrates .....                                                         | 15 |
| Analysis of products .....                                                                     | 15 |
| Chiral GC analyses .....                                                                       | 19 |
| NMR spectra .....                                                                              | 29 |
| Homology model of FDR-Rh1 .....                                                                | 39 |
| References .....                                                                               | 39 |

## Codon optimized nucleotide sequence of FDR from *Mycobacterium hassiacum* (FDR-Mha)

5'-

ATGGATCCGAAAAATAAACCGGCTCAACTGAACTCCCCGTGGGTCTCCAAAATCATGAAATATGGTGG  
CAAAGCACACGTCGCAGTCTATCGTCTGACCGGCGGTTCGCATTGGCAGTAAATGGCGTATCGGCGCTG  
GTTTTAAAAAACCGGTTCCGACGCTGCTGCTGGAACATGTGGGCCGTAAAAGCGGTAAACGCTTCGTC  
ACCCCGCTGGTGTATATTACGGATGGCCCGGACATCGTGGTTGTCGCATCTCAGGGCGGTCTGTGATGAC  
CACCCGCAATGGTATCGCAACCTGGTTGCCAATCCGGAAGCATAACGTCGAAATTGGTTCGTGAACGTCG  
CGCAGTGCCTGCTGTTACCGCAGATCCGGAAGAACGTGCCCGCCTGTGGCCGAAACTGGTTGATGCGT  
ACGCCGACTTTGACACCTACCAATCGTGGGCGAATCGTGAAATCCCGGTCGTTATCCTGCAGCCGCGTA  
A-3'

## Primers used for amplifying FDR-Rh1 (ro04677) and FDR-Rh2 (ro05392) genes from *Rhodococcus* RHA1 genomic DNA

|                                  | Sequence (5'→3') | Template strand             |
|----------------------------------|------------------|-----------------------------|
| <b>FDR-Rh1</b><br>(RHA1_ro04677) | Reverse primer   | <b>CTATCGGGGAGTGCAGACCA</b> |
|                                  | Forward primer   | <b>ATGAATGCACCCGCACCC</b>   |
| <b>FDR-Rh2</b><br>(RHA1_ro05392) | Reverse primer   | <b>TCAGGTCGTGGGGTCGAG</b>   |
|                                  | Forward primer   | <b>ATGCCGACGGACCGC</b>      |

### Rh1: RHA1\_ro04677

>NC\_008268.1:c4929566-4929081 *Rhodococcus jostii* RHA1

5'-

ATGAATGCACCCGCACCCGCCCCGACCGCCCGGCCTCGACTCGAAGTGGACGGTCTCCTTCATCAAGTG  
GATGTCGAAGATCAACGTCGTGCTCTACCGGCGGACGGGCGGGCGCCTGGGCAGCAAGTGGCGGGTG  
GGCAGCGCCTTCCCCCGCGGGTTGCCCCGTCTGCCTGCTCACCACCACGGGACGGAAGAGCGGCGAGCC  
GCGGATCAGCCCGCTGCTGTTCTCGAGGACGGCGACCGCATCATCCTCGTCGCCTCGCAGGGCGGCCT  
CCCGAAGCACCCGATGTGGTACCTCAACCTGCGCGCGAACCCCGACGTGACCGTCCAGGTGAAGTCGC  
GGGTCCGGCCGATGACCGCCACGTGGCGGACCCCGAGGAACGCGCGCGCCTGTGGCCGCGGCTCGTC  
GCCATGTATCCGGATTTTCGACAACTACCAGGCCTGGACCGACCGCACGATCCCCGTCGTGGTCTGCACT  
CCCCGATAG-3'

### Rh2: RHA1\_ro05392

>NC\_008268.1:c5741722-5741291 *Rhodococcus jostii* RHA1

5'-

ATGCCGACGGACCGCGGACTCAAGTTCATGAACGCCGCCACCGCGCCCTCCTGCGCGTGACCGGCGG  
GCGGGTGGGGCGGAGTTTCGGCAAGATGCCGGTGGTGGAGTTGACCACCGTCGGCCGAGGACCGGG  
AAGGTGCACAGCGTCATGCTGACCGTCCCGGTGAGGGAAGGCGACACGCTCGTCGTGGTGGCCTCACG  
CGGCGGCGACGACCGCCACCCCGGTGGTTCTGAACCTGCAGGCCAACCCGGTGGTCCAACGTGTCGC  
TGCAGGGAAACCCCGCGCAGTCCATGCGCGCCACGTGGCAACCCCGGAGGAGCGGGCCCGTCTGTGG  
CCGAAAGTGACCGCCGCTACAAGGGGTATGCCGGCTACCAGAAGAAAACGGACCGCGAGATCCCTCT  
GGTCTGCTCGACCCACGACCTGA-3'

## Cloning, expression and purification of FDRs

*Rhodococcus jostii* RHA1 was grown in lysogeny broth (LB) at 30 °C; subsequently its genomic DNA was extracted using the GenElute Bacterial Genomic DNA kit from Sigma. Two putative FDR genes (RHA1\_ro04677 and RHA1\_ro05392) were amplified from extracted the genomic DNA using Phusion High-Fidelity DNA polymerase (Thermo Scientific) along with the primers listed in table (page 3). The purified PCR products (100–200 ng) were treated with 0.5 U Taq polymerase (Roche) and 0.75 mM dATP by incubation at 72 °C for 15 min. The resulting insert DNA fragments were ligated into the pET-SUMO vector.

The plasmid was then introduced into the chemically competent *Escherichia coli* (BL21) cells using Hanahan method and the transformants were grown at 37 °C in 1 L of Terrific broth (TB) containing 50 µg/ml of kanamycin. When the OD<sub>600</sub> reached 0.5–0.6, isopropyl β-D-1-thiogalactopyranoside (IPTG) was added to a final concentration of 1 mM. After 48 h of induction at 24 °C, the over-expressed cells were centrifuged at 4000 rpm for 20 min at 4 °C. Cells were resuspended in lysis buffer [50 mM KPi pH 8.0, 400 mM NaCl, 100 mM KCl, 20% (v/v) glycerol, 1.0 mM β-mercaptoethanol, 0.5 mM phenylmethylsulfonyl fluoride (PMSF)] and disrupted by sonication using a VCX130 Vibra-Cell at 4 °C (5 s on, 5 s off, 70% amplitude, total of 15 min). The sonicated cells were then centrifuged at 39742 × g for 30 min. The N-terminal His6-tagged fusion protein was purified at 4 °C on a Ni-NTA agarose resin obtained from Qiagen (Hilden, Germany). Briefly, the crude extract was passed directly over a column containing 5 ml of Ni-NTA agarose resin. The column was then washed with KPi buffer (pH 8.0) containing 50 mM imidazole and the N-terminal His6-tagged protein was eluted with phosphate buffer (pH 8.0) containing 500 mM imidazole. The eluted solution containing purified protein was concentrated using an Amicon PM-10 ultrafiltration unit and then desalted against 50 mM Tris/HCl buffer (pH 8.0) containing 20% (v/v) glycerol and 1.0 mM β-mercaptoethanol. The desalted protein was stored at -20 °C for further studies. The concentration of purified enzyme was determined by using the Bradford assay.

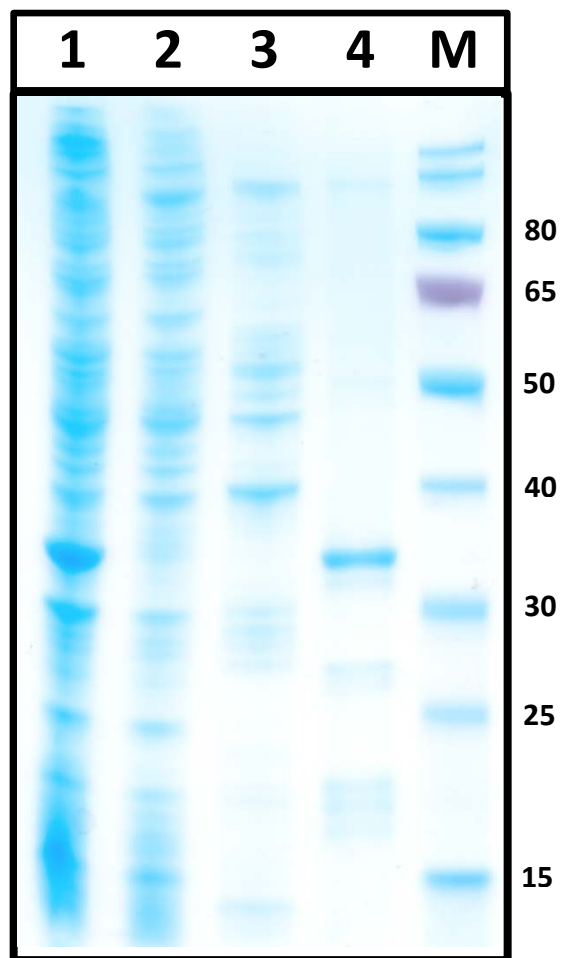

**Fig S1 SDS-PAGE gel of SUMO-Rh1 FDR**

1. Crude free extract
  2. Flow through
  3. Wash fraction (50 mM imidazole)
  4. Elution fraction (500 mM imidazole)
- M Marker
- Yield: 25 mg/L**

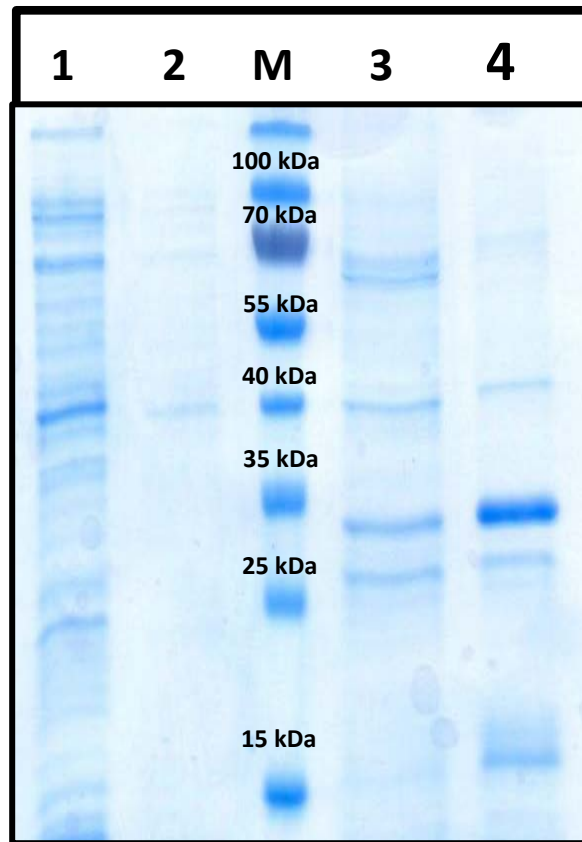

**Fig S2 SDS-PAGE gel of SUMO-Rh2 FDR**

1. Flow through
2. Wash fraction (buffer)
3. Wash fraction (50 mM imidazole)
4. Elution fraction (500 mM imidazole)

M Marker

**Yield: 18 mg/L**

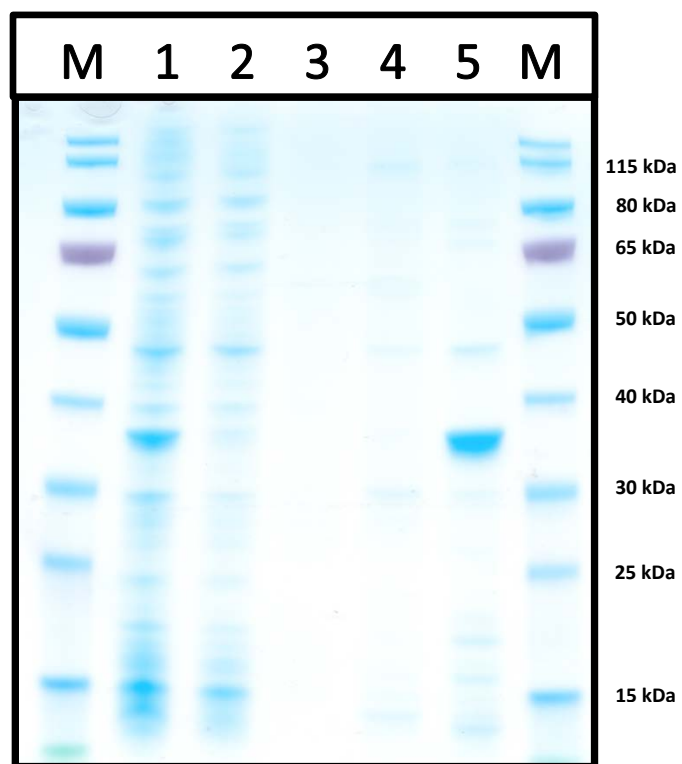

**Fig S3 SDS-PAGE gel of SUMO-Mha FDR**

1. Crude free extract
2. Flow through
3. Wash fraction (5 mM imidazole)
4. Wash fraction (50 mM imidazole)
5. Elution fraction (500 mM imidazole)

M Marker

**Yield: 45 mg/L**

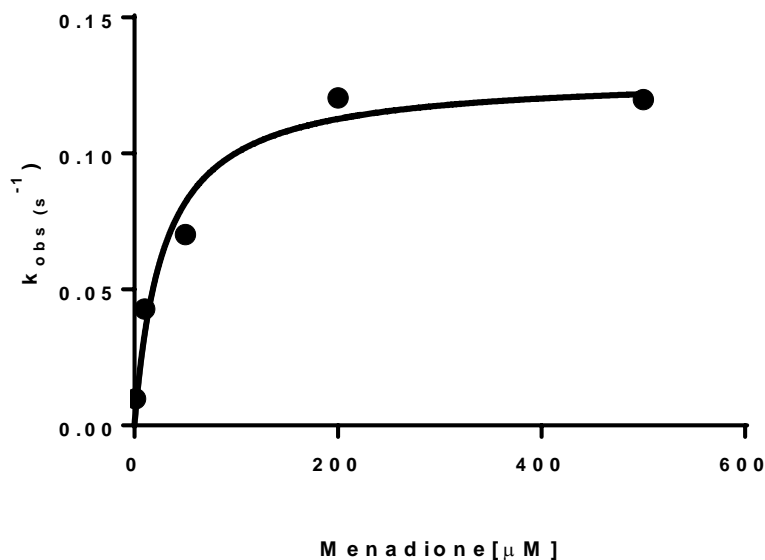

**Fig. S4. Kinetic profile for FDR-Rh1-SUMO.**  $\text{F}_{420}$  oxidation rates were measured in degassed 50 mM Tris/HCl buffer at pH 8.0 and 25 °C (0.1  $\mu\text{M}$  enzyme, 20  $\mu\text{M}$   $\text{F}_{420}\text{H}_2$ , 5-100  $\mu\text{M}$  menadione). Reduced  $\text{F}_{420}$  ( $\text{F}_{420}\text{H}_2$ ) was prepared using a recombinant FGD1-RhA1<sup>1</sup> with SUMO-tag as described earlier, followed by heat inactivation of FGD1 at 55° C water bath for 15 minutes and ultra-filtration (Centricon 10 kDa). Steady-state kinetic parameters for FDR-Rh1 was determined by monitoring the oxidation of  $\text{F}_{420}\text{H}_2$  at 400 nm using an absorption coefficient  $\epsilon_{400 \text{ nm}}$  of 25.7  $\text{mM}^{-1} \text{ cm}^{-1}$  in a V-650 spectrophotometer from Jasco (IJsselstein, The Netherlands).<sup>2</sup> Kinetic data were analyzed using nonlinear regression to the Michealis–Menten equation using GraphPad Prism v. 6.0 (GraphPad Software Inc., La Jolla, CA, USA).



## Synthesis of substrates and products

**General.** The F<sub>420</sub> cofactor and FGD-Rha1 were supplied by GECCO-biotech. Commercially available compounds were purchased from Sigma–Aldrich, Acros Organics and Fluorochem, and used without further purification. All other solvents were obtained as analytical grade and used without further purification. Flash chromatography was performed with Silicycle silica gel SiliaFlash P60. NMR spectra were recorded on an Agilent 400-MR spectrometer (<sup>1</sup>H and <sup>13</sup>C resonances at 400 MHz and 100 MHz, respectively). Chemical shifts are reported in parts per million (ppm) and coupling constants (*J*) are reported in hertz (Hz). The residual <sup>1</sup>H signals from solvent were used as references.

### Synthesis of (2*E*,4*E*)-5-phenylpenta-2,4-dienal (3S)<sup>3</sup>

#### A. (*E*)-1-phenylpenta-1,4-dien-3-ol

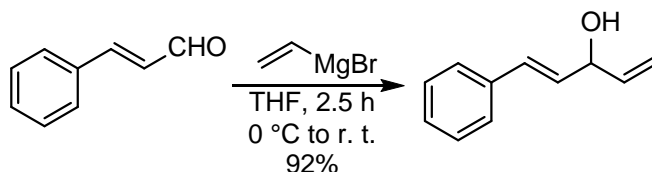

To a solution of cinnamaldehyde (2.35 g, 17.8 mmol) in anhydrous THF (55 mL) was added vinylmagnesium bromide (1.0 M in THF, 20.9 mL, 20.9 mmol) dropwise at 0 °C. The reaction mixture was stirred at 0 °C for 30 min and 2 h at room temperature, after which it was cooled down to 0 °C and then quenched with 10% aqueous NH<sub>4</sub>Cl solution. The reaction mixture was extracted with EtOAc (3 × 120 mL). The combined organic layers were dried over MgSO<sub>4</sub>, filtered and solvents evaporated under reduced pressure. The residue was purified by flash chromatography (SiO<sub>2</sub>, pentane/ethyl acetate = 8:2) to afford the desired product (2.62 g, 92%) as pale yellow oil.

**<sup>1</sup>H NMR** (400 MHz, CDCl<sub>3</sub>) δ 7.46–7.39 (m, 2H), 7.38–7.32 (m, 2H), 7.32–7.25 (m, 1H), 6.65 (dd, *J* = 16.1, 1.3 Hz, 1H), 6.27 (dd, *J* = 15.9, 6.5 Hz, 1H), 6.01 (ddd, *J* = 17.2, 10.4, 5.9 Hz, 1H), 5.38 (dt, *J* = 17.2, 1.4 Hz, 1H), 5.23 (dt, *J* = 10.3, 1.3 Hz, 1H), 4.85 (t, *J* = 6.3 Hz, 1H), 1.84 (s, 1H).

**<sup>13</sup>C NMR** (100 MHz, CDCl<sub>3</sub>) δ 139.4 (CH), 136.7 (C), 131.0 (CH), 130.5 (CH), 128.7 (2xCH), 127.9 (CH), 126.7 (2xCH), 115.6 (CH<sub>2</sub>), 74.0 (CH). The characterization data for this compound matched that of a previous report.

**B. (2E,4E)-5-phenylpenta-2,4-dien-1-ol**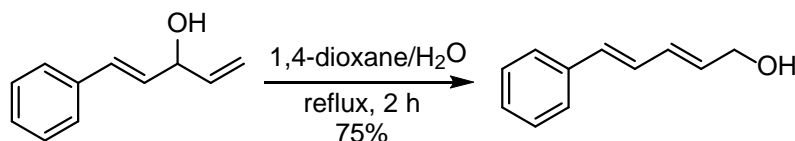

To a solution of (*E*)-1-phenylpenta-1,4-dien-3-ol (2.62 g, 16.4 mmol) in 1,4-dioxane (40 mL) was added H<sub>2</sub>O (370 mL). Reaction mixture was stirred vigorously to reflux under N<sub>2</sub> atmosphere for 2 h. After that reaction mixture was cooled to room temperature and brine was added (100 mL). The mixture was extracted with EtOAc (3 × 300 mL), washed with brine, dried over MgSO<sub>4</sub>, filtered and solvents evaporated under reduced pressure. The residue was purified by flash chromatography (SiO<sub>2</sub>, pentane/ethyl acetate = 2:1) to afford the desired product (1.98 g, 75%) as white solid.

**<sup>1</sup>H NMR** (400 MHz, CDCl<sub>3</sub>) δ 7.40 (d, *J* = 7.2 Hz, 2H), 7.32 (t, *J* = 7.5 Hz, 2H), 7.28–7.20 (m, 1H), 6.80 (dd, *J* = 15.6, 10.5 Hz, 1H), 6.56 (d, *J* = 15.7 Hz, 1H), 6.43 (dd, *J* = 15.2, 10.4 Hz, 1H), 5.97 (dt, *J* = 15.2, 5.8 Hz, 1H), 4.25 (d, *J* = 5.9 Hz, 2H), 1.81 (br s, 1H).

**<sup>13</sup>C NMR** (100 MHz, CDCl<sub>3</sub>) δ 137.2 (C), 132.8 (CH), 132.6 (CH), 131.7 (CH), 128.7 (2xCH), 128.3 (CH), 127.7 (CH), 126.5 (2xCH), 63.5 (CH<sub>2</sub>). The characterization data for this compound matched that of a previous report.

**C. (2E,4E)-5-phenylpenta-2,4-dienal (3S)**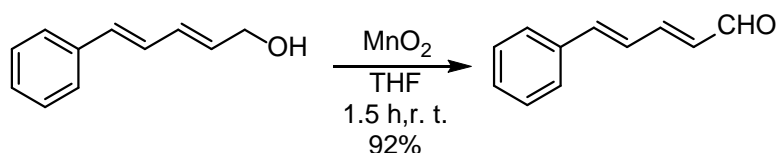

To a solution of the (2*E*,4*E*)-5-phenylpenta-2,4-dien-1-ol (601 mg, 3.8 mmol) in THF (36 mL) was added MnO<sub>2</sub> (3.24 g, 37.3 mmol). The reaction mixture was stirred for 1.5 h and then filtered through a pad of celite to remove inorganic compounds. The filtrate was concentrated and the residue was purified by flash chromatography (SiO<sub>2</sub>, pentane/ethyl acetate = 4:1) to afford the aldehyde **3S** (546.0 mg, 92%) as colorless oil.

**<sup>1</sup>H NMR** (400 MHz, CDCl<sub>3</sub>) δ 9.61 (d, *J* = 7.9 Hz, 1H), 7.54–7.47 (m, 2H), 7.42–7.33 (m, 3H), 7.29–7.21 (m, 1H), 7.04–6.97 (m, 2H), 6.26 (dd, *J* = 15.2, 7.9 Hz, 1H).

$^{13}\text{C}$  NMR (100 MHz,  $\text{CDCl}_3$ )  $\delta$  193.6 (CH), 152.1 (CH), 142.5 (CH), 135.7 (C), 131.7 (CH), 129.8 (CH), 129.0 (2xCH), 127.6 (2xCH), 126.3 (CH). The characterization data for this compound matched that of a previous report.

## Synthesis of (*E*)-5-phenylpenta-4-enal (3P)

### A. 5-phenylpent-4-yn-1-ol<sup>4</sup>

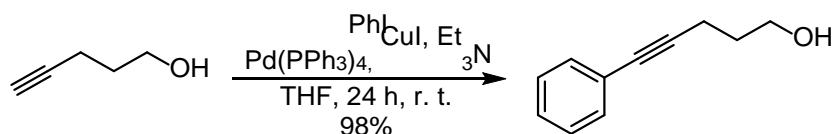

$\text{Pd}(\text{PPh}_3)_4$  (123 mg, 0.11 mmol, 1 mol %) was dissolved in anhydrous THF (5 mL) under  $\text{N}_2$  atmosphere. 4-Pentyn-1-ol (1.0 mL, 10.8 mmol), iodobenzene (2.38 mL, 21.3 mmol), triethylamine (28.6 mL, 205.2 mmol) and  $\text{CuI}$  (40.5 mg, 0.21 mmol, 2 mol %) were added sequentially and the reaction mixture was stirred at room temperature for 24 h. After that reaction mixture was filtered through a pad of celite and concentrated under reduced pressure. The residue was purified by flash chromatography ( $\text{SiO}_2$ , pentane/ethyl acetate = 2:1) to afford the desired product (1.68 g, 98%) as orange oil.

$^1\text{H}$  NMR (400 MHz,  $\text{CDCl}_3$ )  $\delta$  7.43–7.36 (m, 2H), 7.31–7.24 (m, 3H), 3.81 (t,  $J = 6.2$  Hz, 2H), 2.54 (t,  $J = 6.9$  Hz, 2H), 1.85 (quint.,  $J = 6.6$  Hz, 2H), 1.75 (br s, 1H).

$^{13}\text{C}$  NMR (100 MHz,  $\text{CDCl}_3$ )  $\delta$  131.6 (2xCH), 128.3 (2xCH), 127.8 (CH), 123.8 (C), 89.5 (C), 81.2 (C), 61.9 ( $\text{CH}_2$ ), 31.5 ( $\text{CH}_2$ ), 16.1 ( $\text{CH}_2$ ). The characterization data for this compound matched that of a previous report.

### B. (*E*)-5-phenylpent-4-en-1-ol<sup>4</sup>

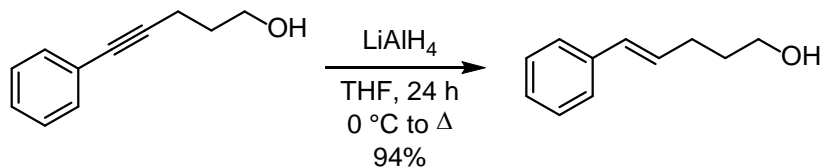

To a suspension of  $\text{LiAlH}_4$  (2.00 g, 52.7 mmol) in anhydrous THF (9 mL) at 0 °C was added dropwise a solution of 5-phenylpent-4-yn-1-ol (1.60, 10.0 mmol) in anhydrous THF (9 mL). The reaction mixture was stirred at 0 °C for 20 min, and then refluxed for 24 h. After that reaction mixture was cooled to 0 °C, and quenched by the sequential addition of water (2.0 mL), a 15% aqueous solution of  $\text{NaOH}$  (2.0 mL) and additional water (6.0 mL). The resulting white

precipitate was filtered through a pad of celite and washed with Et<sub>2</sub>O. The filtrate was dried over MgSO<sub>4</sub>, filtered and concentrated under reduced pressure. The residue was purified by flash chromatography (SiO<sub>2</sub>, pentane/ethyl acetate = 2:1) to afford the desired product (1.53 g, 94%) as colorless oil.

**<sup>1</sup>H NMR** (400 MHz, CDCl<sub>3</sub>) δ 7.39–7.28 (m, 4H), 7.25–7.18 (m, 1H), 6.44 (d, *J* = 15.7 Hz, 1H), 6.24 (dt, *J* = 15.8, 6.9 Hz, 1H), 3.71 (t, *J* = 6.5 Hz, 2H), 2.32 (qd, *J* = 7.1, 1.4 Hz, 2H), 1.77 (quint., *J* = 6.9 Hz, 2H), 1.71 (br s, 1H).

**<sup>13</sup>C NMR** (100 MHz, CDCl<sub>3</sub>) δ 137.7 (C), 130.5 (CH), 130.2 (CH), 128.6 (2xCH), 127.0 (CH), 126.0 (2xCH), 62.4 (CH<sub>2</sub>), 32.3 (CH<sub>2</sub>), 29.4 (CH<sub>2</sub>). The characterization data for this compound matched that of a previous report.

**C. (*E*)-5-phenylpenta-4-enal (3P)**

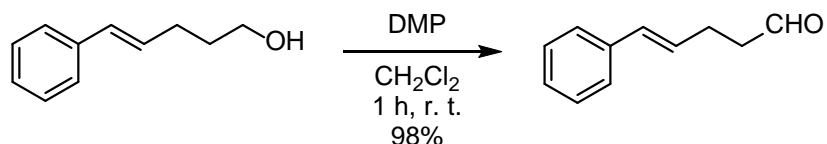

*Dess-Martin* periodinane (340.0 mg, 0.80 mmol) was added to solution of (*E*)-5-phenylpent-4-en-1-ol (100.0 mg, 0.62 mmol) in dichloromethane (12.3 mL) and the reaction mixture was stirred at room temperature for 1 h. After that reaction mixture was quenched with 10% aqueous solution of sodium thiosulfate (10.0 mL) and the organic layer washed with sat. aq. NaHCO<sub>3</sub>, dried over MgSO<sub>4</sub>, filtered and concentrated under reduced pressure. The residue was purified by flash chromatography (SiO<sub>2</sub>, pentane/ethyl acetate = 9:1) to afford the aldehyde **3P** (97.0 mg, 98%) as colorless oil.

**<sup>1</sup>H NMR** (400 MHz, CDCl<sub>3</sub>) δ 9.82 (t, *J* = 1.5 Hz, 1H), 7.37 – 7.28 (m, 4H), 7.25 – 7.19 (m, 1H), 6.44 (d, *J* = 15.8 Hz, 1H), 6.21 (dt, *J* = 15.8, 6.6 Hz, 1H), 2.66 – 2.60 (m, 2H), 2.59 – 2.52 (m, 2H).

**<sup>13</sup>C NMR** (100 MHz, CDCl<sub>3</sub>) δ 201.8 (CH), 137.3 (C), 131.2 (CH), 128.6 (2xCH), 128.2 (CH), 127.3 (CH), 126.1 (2xCH), 43.4 (CH<sub>2</sub>), 25.6 (CH<sub>2</sub>). The characterization data for this compound matched that of a previous report.<sup>5</sup>

### Synthesis of geranial (4P)

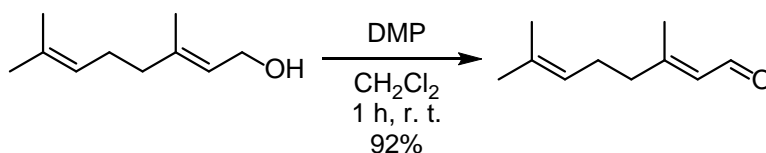

*Dess-Martin* periodinane (195.0 mg, 0.46 mmol) was added to solution of geraniol (50  $\mu\text{L}$ , 0.28 mmol) in dichloromethane (2.0 mL) and the reaction mixture was stirred at room temperature for 1 h. After that reaction mixture was quenched with 10% aqueous solution of sodium thiosulfate (2.0 mL) and the organic layer washed with sat. aq.  $\text{NaHCO}_3$ , dried over  $\text{MgSO}_4$ , filtered and concentrated under reduced pressure. The residue was purified by flash chromatography ( $\text{SiO}_2$ , pentane/ethyl acetate = 95:5) to afford the geranial **4P** (39.8 mg, 92%) as colorless oil.

**$^1\text{H}$  NMR** (400 MHz,  $\text{CDCl}_3$ )  $\delta$  9.99 (d,  $J$  = 8.0 Hz, 1H), 5.88 (dd,  $J$  = 8.2, 1.3 Hz, 1H), 5.11–5.03 (m, 1H), 2.27–2.17 (m, 4H), 2.17 (d,  $J$  = 1.3 Hz, 3H), 1.69 (s, 3H), 1.61 (s, 3H).

**$^{13}\text{C}$  NMR** (100 MHz,  $\text{CDCl}_3$ )  $\delta$  191.5 (CH), 164.0 (C), 133.1 (C), 127.6 (CH), 122.7 (CH), 40.8 ( $\text{CH}_2$ ), 25.9 ( $\text{CH}_2$ ), 25.8 ( $\text{CH}_3$ ), 17.9 ( $\text{CH}_3$ ), 17.8 ( $\text{CH}_3$ ). The characterization data for this compound matched that of a previous report.<sup>6</sup>

### Synthesis of neral (5P)

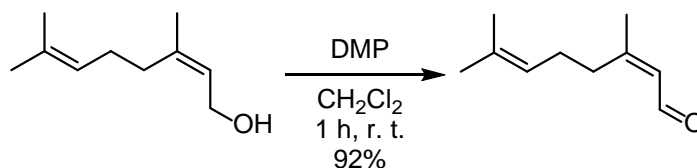

*Dess-Martin* periodinane (193.0 mg, 0.45 mmol) was added to solution of nerol (50  $\mu\text{L}$ , 0.28 mmol) in dichloromethane (2.0 mL) and the reaction mixture was stirred at room temperature for 1 h. After that reaction mixture was quenched with 10% aqueous solution of sodium thiosulfate (2.0 mL) and the organic layer washed with sat. aq.  $\text{NaHCO}_3$ , dried over  $\text{MgSO}_4$ , filtered and concentrated under reduced pressure. The residue was purified by flash

chromatography (SiO<sub>2</sub>, pentane/ethyl acetate = 95:5) to afford the neral **5P** (40.0 mg, 92%) as colorless oil.

**<sup>1</sup>H NMR** (400 MHz, CDCl<sub>3</sub>) δ 9.90 (d, *J* = 8.2 Hz, 1H), 5.87 (d, *J* = 8.2 Hz, 1H), 5.14–5.07 (m, 1H), 2.58 (t, *J* = 7.5 Hz, 2H), 2.23 (q, *J* = 7.4 Hz, 2H), 1.98 (d, *J* = 1.3 Hz, 3H), 1.68 (s, 3H), 1.59 (s, 3H).

**<sup>13</sup>C NMR** (100 MHz, CDCl<sub>3</sub>) δ 190.9 (CH), 163.9 (C), 133.9 (C), 128.8 (CH), 122.4 (CH), 32.8 (CH<sub>2</sub>), 27.2 (CH<sub>2</sub>), 25.8 (CH<sub>3</sub>), 25.2 (CH<sub>3</sub>), 17.9 (CH<sub>3</sub>). The characterization data for this compound matched that of a previous report.<sup>7</sup>

## Synthesis of 2,2,6-trimethylcyclohexane-1,4-dione (**15P**)

### A. 4-hydroxy-3,3,5-trimethylcyclohexan-1-one

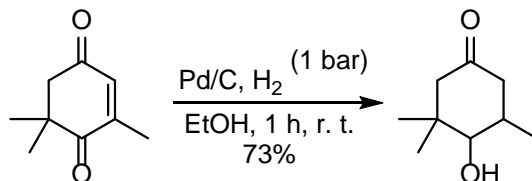

To suspension of ketoisophorone (21.9 mg, 0.14 mmol) and 10% palladium on carbon (8.8 mg, 0.01 mmol, 6 mol%) in ethanol (1.3 mL) was bubbled hydrogen at room temperature during 1 h. After that reaction mixture was filtered through a pad of celite and washed with ethanol. The filtrate was concentrated under reduced pressure. The residue was purified by flash chromatography (SiO<sub>2</sub>, pentane/ethyl acetate = 2:1) to afford the desired product (16.4 mg, 73%) as colorless oil.

**<sup>1</sup>H NMR** (400 MHz, CDCl<sub>3</sub>) δ 3.33 (s, 1H), 2.59 (d, *J* = 13.6 Hz, 1H), 2.35 (t, *J* = 13.3 Hz, 1H), 2.27–2.16 (m, 1H), 2.11–2.02 (m, 1H), 1.97 (br s, 1H), 1.88 (d, *J* = 13.6 Hz, 1H), 1.09 (s, 3H), 1.06 (d, *J* = 6.6 Hz, 3H), 0.87 (s, 3H).

**<sup>13</sup>C NMR** (100 MHz, CDCl<sub>3</sub>) δ 214.8 (C), 79.8 (CH), 51.1 (CH<sub>2</sub>), 45.7 (CH<sub>2</sub>), 42.3 (C), 35.7 (CH), 29.8 (CH<sub>3</sub>), 28.3 (CH<sub>3</sub>), 20.9 (CH<sub>3</sub>).

### B. 2,2,6-trimethylcyclohexane-1,4-dione (**11P**)

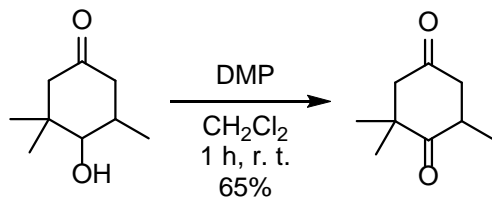

*Dess-Martin* periodinane (92.0 mg, 0.22 mmol) was added to solution of 4-hydroxy-3,3,5-trimethylcyclohexan-1-one (27.7. mg, 0.18 mmol) in dichloromethane (2.1 mL) and the reaction mixture was stirred at room temperature for 1 h. After that reaction mixture was quenched with 10% aqueous solution of sodium thiosulfate (2.0 mL) and the organic layer washed with sat. aq. NaHCO<sub>3</sub>, dried over MgSO<sub>4</sub>, filtered and concentrated under reduced pressure. The residue was purified by flash chromatography (SiO<sub>2</sub>, pentane/ethyl acetate = 2:1) to afford the desired product **15P** (17.9 mg, 65%) as colorless oil.

**<sup>1</sup>H NMR** (400 MHz, CDCl<sub>3</sub>) δ 3.06–2.91 (m, 1H), 2.79–2.74 (m, 1H), 2.74–2.71 (m, 1H), 2.51 (d, *J* = 15.4 Hz, 1H), 2.33 (dd, *J* = 17.7, 13.3 Hz, 1H), 1.20 (s, 3H), 1.14 (d, *J* = 6.6 Hz, 3H), 1.11 (s, 3H).

**<sup>13</sup>C NMR** (100 MHz, CDCl<sub>3</sub>) δ 214.2 (C), 208.0 (C), 52.9 (CH<sub>2</sub>), 45.0 (CH<sub>2</sub>), 44.4 (C), 40.0 (CH), 26.7 (CH<sub>3</sub>), 25.7 (CH<sub>3</sub>), 14.7 (CH<sub>3</sub>). The characterization data for this compound matched that of a previous report.<sup>8</sup>

## Enzymatic reaction of substrates

A typical reaction mixture contained 400 μL of 50 mM Tris/HCl supplemented with 1 mM of substrate, 20 μM of F<sub>420</sub>, 0.1 μM of FGD-Rha1<sup>1</sup>, 10 mM glucose 6-phosphate, 25 μM SUMO-FDRs and DMSO (3% v/v). The reaction was performed in a closed 2 mL glass vial in the dark at 24 °C and 135 rpm.

## Analysis of products

Substrates (**1–15**) were initially analyzed in HPLC to see the depletion of substrate at 240 nm. On the confirmation of complete depletion of substrates, the reaction mixture was extracted with equal volume of ethyl acetate containing 2 mM of mesitylene as an external standard. This mixture was then vortexed, centrifuged (13,000 rpm, 10 minutes), passed over anhydrous magnesium sulfate and finally analyzed using GC-MS QP<sub>2010</sub> ultra (Shimadzu) with electron ionization and quadrupole separation. The column employed was a HP-1 (Agilent, 30 mx 0.25 mm x 0.25 μm) and the method used for the GC-MS is mentioned below.

Injection temp: 300 °C; Oven program: 40 °C for 2 min; 5 °C/min until 100 °C for 0 min; 10 °C/min until 250 °C for 10 mins.

3  $\mu$ L was injected in to the GC and the split ratio was 5. The software to analyze chromatograms, MS spectra and to generate the figures was GCMSsolution Postrun Analysis 4.11 (Shimadzu). The library for the MS spectra was NIST11. The products were confirmed with commercial standards/synthesized products.

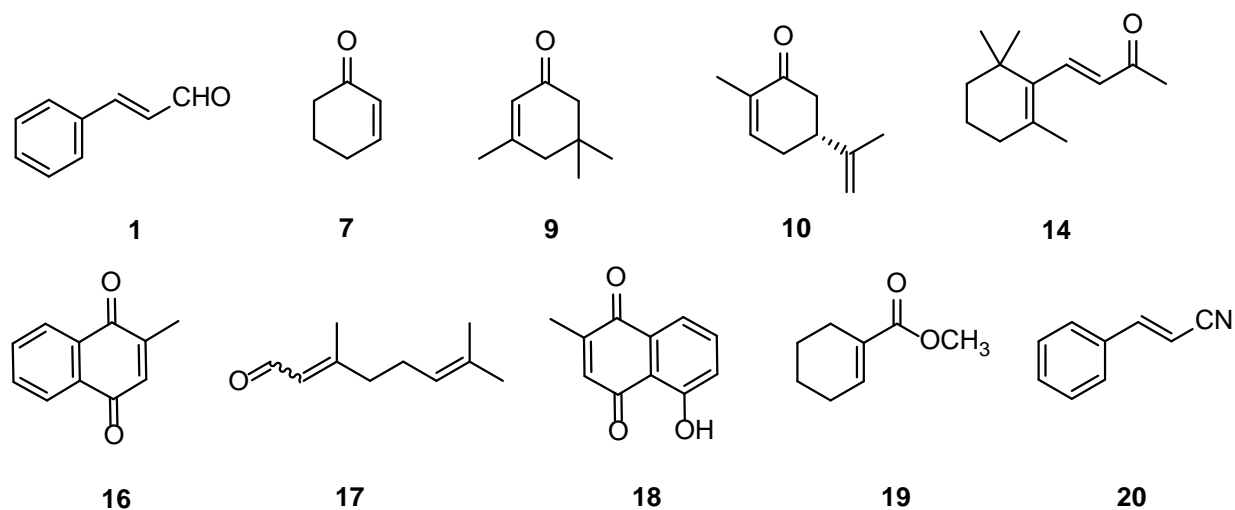

**Fig. S5. Substrates used for the initial screening with crude extracts containing FDR-Mha, FDR-Rh1, and FDR-Rh2 respectively.**



**Table S1 Initial screening of substrates using FDR-Rh1, FDR-Rh2 and FDR-Mha whole cell reactions.** Reaction conditions: 1.0 mM substrate, F<sub>420</sub> (100  $\mu$ M), G6P (10 mM), FGD-Rha1 (10 mg/mL), SUMO-FDRs (10 mg/mL), DMSO (10% v/v), Tris/HCl (50 mM, pH 8.0) at 25 °C for 18h. The degree of conversion was determined semi-quantitatively by analyzing GC peaks of substrates and products. The conversions are categorized as 100%, +++; >50%, ++; 1-50%, +; and 0%, -.

|           |    | Rh1 | Rh2 | Mha |
|-----------|----|-----|-----|-----|
| Ketones   | 7  | +++ | ++  | ++  |
|           | 9  | +   | -   | -   |
|           | 10 | ++  | +   | +   |
|           | 14 | ++  | +   | +   |
| Quinones  | 16 | +++ | +++ | +++ |
|           | 18 | +++ | +++ | +++ |
| Ester     | 19 | -   | -   | -   |
| Nitrile   | 20 | -   | -   | -   |
| Aldehydes | 1  | +++ | +++ | +++ |
|           | 17 | +++ | +++ | +++ |

**Table S2 Retention time of substrates and products.**

| <b>Substrates</b> | <b>Retention time<br/>(min)</b> | <b>Products</b> | <b>Retention time<br/>(min)</b>              |
|-------------------|---------------------------------|-----------------|----------------------------------------------|
| <b>1S</b>         | 17.1                            | <b>1P</b>       | 14.6                                         |
| <b>2S</b>         | 18.1                            | <b>2P</b>       | 15.7                                         |
| <b>3S</b>         | 20.4                            | <b>3P</b>       | 20.0                                         |
| <b>4S</b>         | 17.3                            | <b>4P</b>       | 14.8                                         |
| <b>5S</b>         | 16.7                            | <b>5P</b>       | 14.8                                         |
| <b>6S</b>         | 8.4                             | <b>6P</b>       | 7.2                                          |
| <b>7S</b>         | 7.7                             | <b>7P</b>       | 6.8                                          |
| <b>8S</b>         | 11.4                            | <b>8P</b>       | 8.6                                          |
| <b>9S</b>         | 13.6                            | <b>9P</b>       | 11.3                                         |
| <b>10S</b>        | 16.8                            | <b>10P</b>      | 15.8 ( <i>trans</i> )<br>15.9 ( <i>cis</i> ) |
| <b>11S</b>        | 8.9                             | <b>11P</b>      | 5.9                                          |
| <b>12S</b>        | 9.8                             | <b>12P</b>      | 8.5                                          |
| <b>13S</b>        | 7.2                             | <b>13P</b>      | 5.8                                          |
| <b>14S</b>        | 20.9                            | <b>14P</b>      | 20.2                                         |
| <b>15S</b>        | 14.0                            | <b>15P</b>      | 14.5                                         |

## Chiral GC analyses

The chiral analysis for **4**, **5**, **8**, **9**, **11**, **12**, **13** and **15** was determined by chiral GC-FID. GC-FID analyses were carried out with a Agilent Technologies 7890A GC system using a Agilent CP Chirasil-Dex CB capillary column (25 m x 0.25 mm, 0.25  $\mu$ m film), injector and detector temperatures of 250 °C and a 50:1 split ratio were used for substrates **8**, **9**, **11**, **12**, **13** and **15**. For substrate **4** and **5** was used the same Agilent GC system with Aurora Borealis FS-Hydrodex-B-TBDAC capillary column (25 m x 0.25 mm, 0.25  $\mu$ m film), injector and detector temperatures of 250 °C and a 50:1 split ratio.

The temperature program for **4** and **5** was: 40 °C hold 0 min, 10 °C min<sup>-1</sup> to 80 °C, hold 2 min, 1 °C min<sup>-1</sup> to 95 °C, hold 0 min, 0.5 °C min<sup>-1</sup> to 100 °C, hold 5 min, 10 °C min<sup>-1</sup> to 180 °C, hold 5 min. Retention times were: geranial **4**: 42.4 min, neral **5**: 41.1 min, (*R*)-citronellal: 32.9 min, (*S*)-citronellal: 32.3 min. The absolute configuration of (*R*)-citronellal was determined by commercially available (*R*)-citronellal (Sigma Aldrich).

The temperature program for **8** was: 40 °C hold 0 min, 5 °C min<sup>-1</sup> to 95 °C, hold 10 min, 10 °C min<sup>-1</sup> to 150 °C, hold 10 min. Retention times were: **8S**: 23.7 min, (*R*)-**8P**: 17.3 min, (*S*)-**8P**: 17.6 min. The absolute configuration of (*R*)-**8P** was determined by commercially available (*R*)-3-methylcyclohexan-1-one (Sigma Aldrich).

The temperature program for **9** was: 40 °C hold 0 min, 5 °C min<sup>-1</sup> to 180 °C, hold 10 min. Retention times were: **9S**: 19.4 min, (*R*)-**9P**: 17.3 min, (*S*)-**9P**: 17.0 min. The absolute configuration of (*R*)-**9P** was determined by commercially available (*S*)-3,3,5-trimethylcyclohexan-1-one (Enamine).

The temperature program for **11** was: 40 °C hold 0 min, 2 °C min<sup>-1</sup> to 55 °C, hold 40 min, 10 °C min<sup>-1</sup> to 150 °C, hold 5 min. Retention times were: **11S**: 53.0 min, (*R*)-**11P**: 33.6 min, (*S*)-**11P**: 34.0 min. The absolute configuration of (*R*)-**11P** was determined by commercially available (*R*)-3-methylcyclopentan-1-one (Sigma Aldrich).

The temperature program for **12** was: 80 °C hold 6.5 min, 10 °C min<sup>-1</sup> to 130 °C, hold 3 min. Retention times were: **12S**: 11.4 min, (*S*)-**12P**: 10.9 min, (*R*)-**12P**: 11.0 min. The absolute configuration of (*R*)-**12P** was determined by described method for the same compound on the same column.<sup>9</sup>

The temperature program for **13** was: 40 °C hold 0 min, 5 °C min<sup>-1</sup> to 68 °C, hold 15 min, 10 °C min<sup>-1</sup> to 160 °C, hold 2 min. Retention times were: **13S**: 20.8 min, (*R*)-**13P**: 16.7 min, (*S*)-**13P**: 17.0 min. The absolute configuration of (*R*)-**13P** was determined by described method for the same compound on the same column.<sup>10</sup>

The temperature program for **15** was: 90 °C hold 2 min, 4 °C min<sup>-1</sup> to 115 °C, hold 0 min, 10 °C min<sup>-1</sup> to 180 °C, hold 2 min. Retention times were: **15S**: 12.2 min, (*R*)-**15P**: 12.7 min, (*S*)-**15P**:

12.8 min. The absolute configuration of (*S*)-**15P** was determined by described method for the same compound on the same column.<sup>11</sup>

**Table S3 Retention time of substrates and products for chiral analysis.**

| <b>Substrates</b> | <b>Retention time<br/>(min)</b> | <b>Products</b> | <b>Retention time<br/>(min)</b>        |
|-------------------|---------------------------------|-----------------|----------------------------------------|
| <b>4S</b>         | 42.4                            | <b>4P</b>       | 32.3 ( <i>S</i> )<br>32.9 ( <i>R</i> ) |
| <b>5S</b>         | 41.1                            | <b>5P</b>       | 32.3 ( <i>S</i> )<br>32.9 ( <i>R</i> ) |
| <b>8S</b>         | 23.7                            | <b>8P</b>       | 17.3 ( <i>R</i> )<br>17.6 ( <i>S</i> ) |
| <b>9S</b>         | 19.4                            | <b>9P</b>       | 17.0 ( <i>S</i> )<br>17.3 ( <i>R</i> ) |
| <b>11S</b>        | 53.0                            | <b>11P</b>      | 33.6 ( <i>R</i> )<br>34.0 ( <i>S</i> ) |
| <b>12S</b>        | 11.4                            | <b>12P</b>      | 10.9 ( <i>S</i> )<br>11.0 ( <i>R</i> ) |
| <b>13S</b>        | 20.8                            | <b>13P</b>      | 16.7 ( <i>R</i> )<br>17.0 ( <i>S</i> ) |
| <b>15S</b>        | 12.2                            | <b>15P</b>      | 12.7 ( <i>R</i> )<br>12.8 ( <i>S</i> ) |

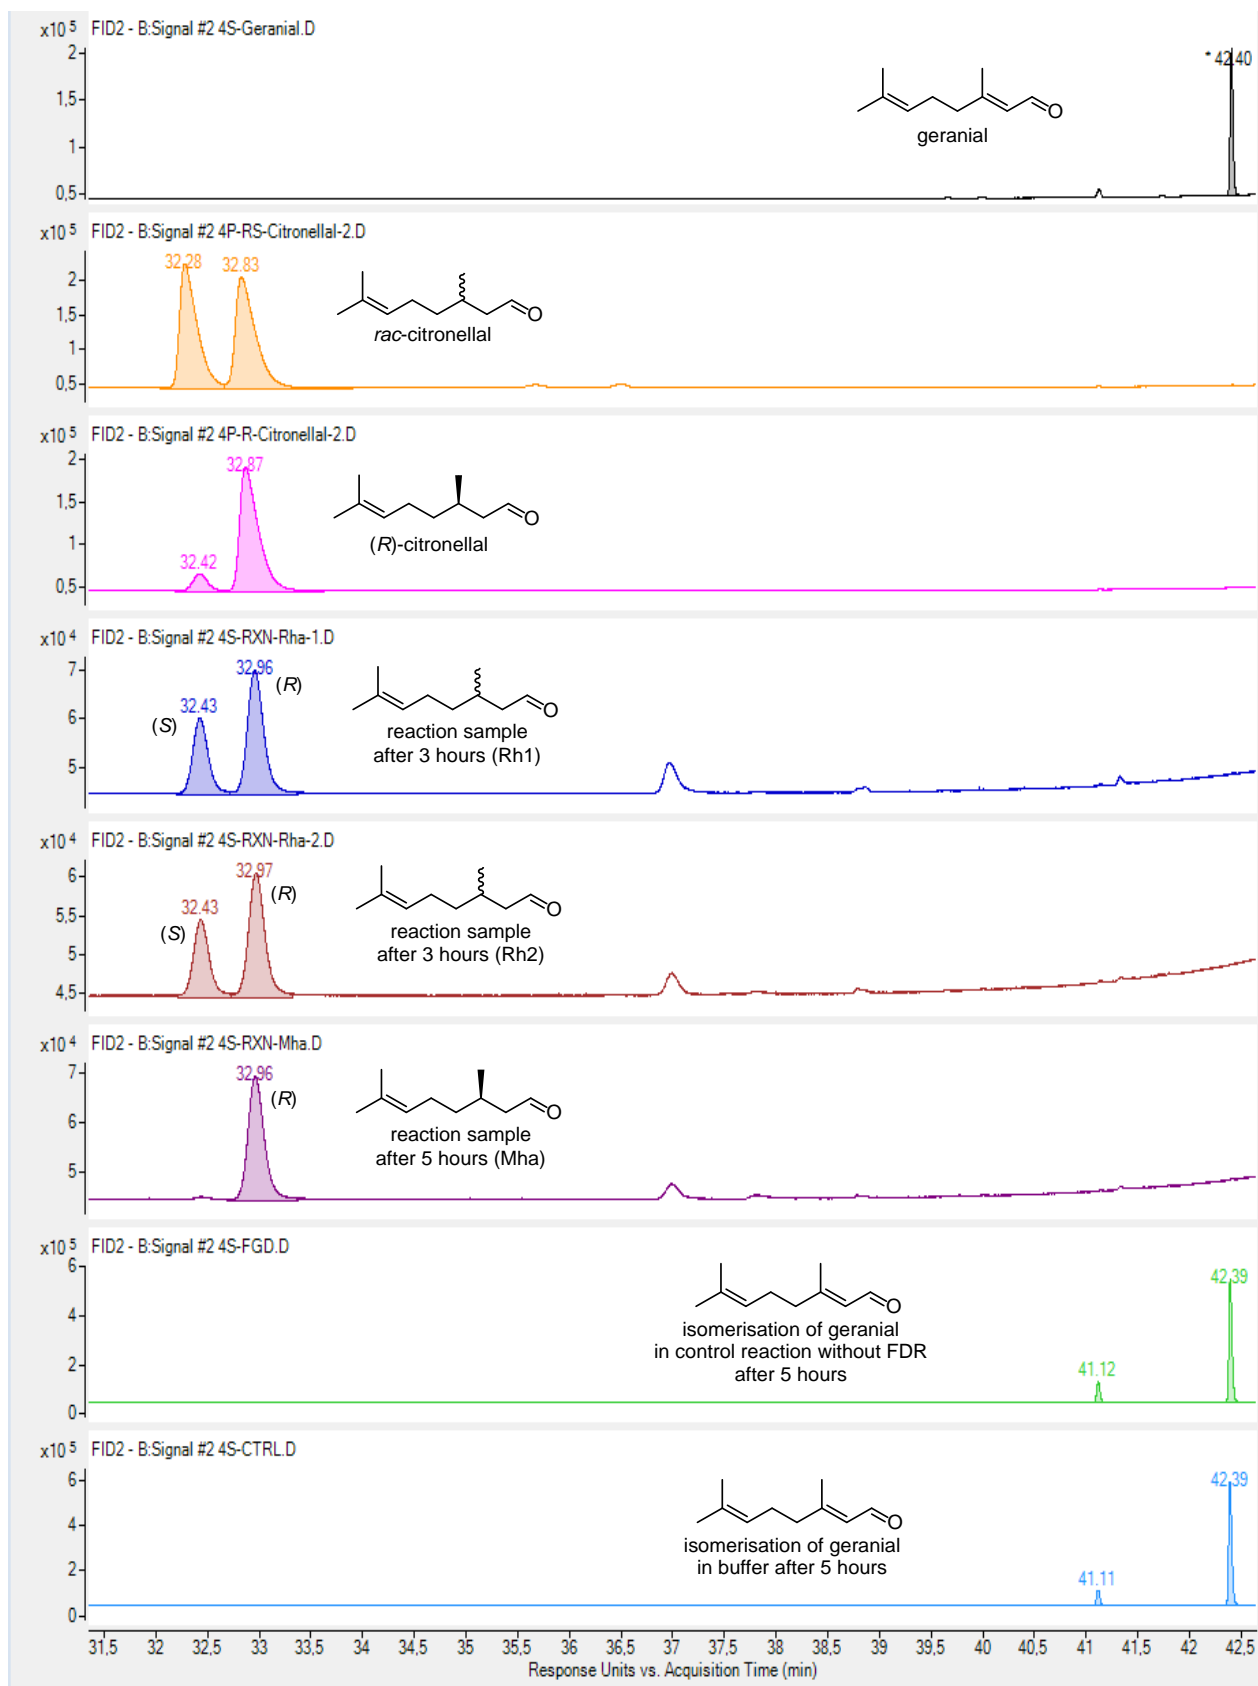

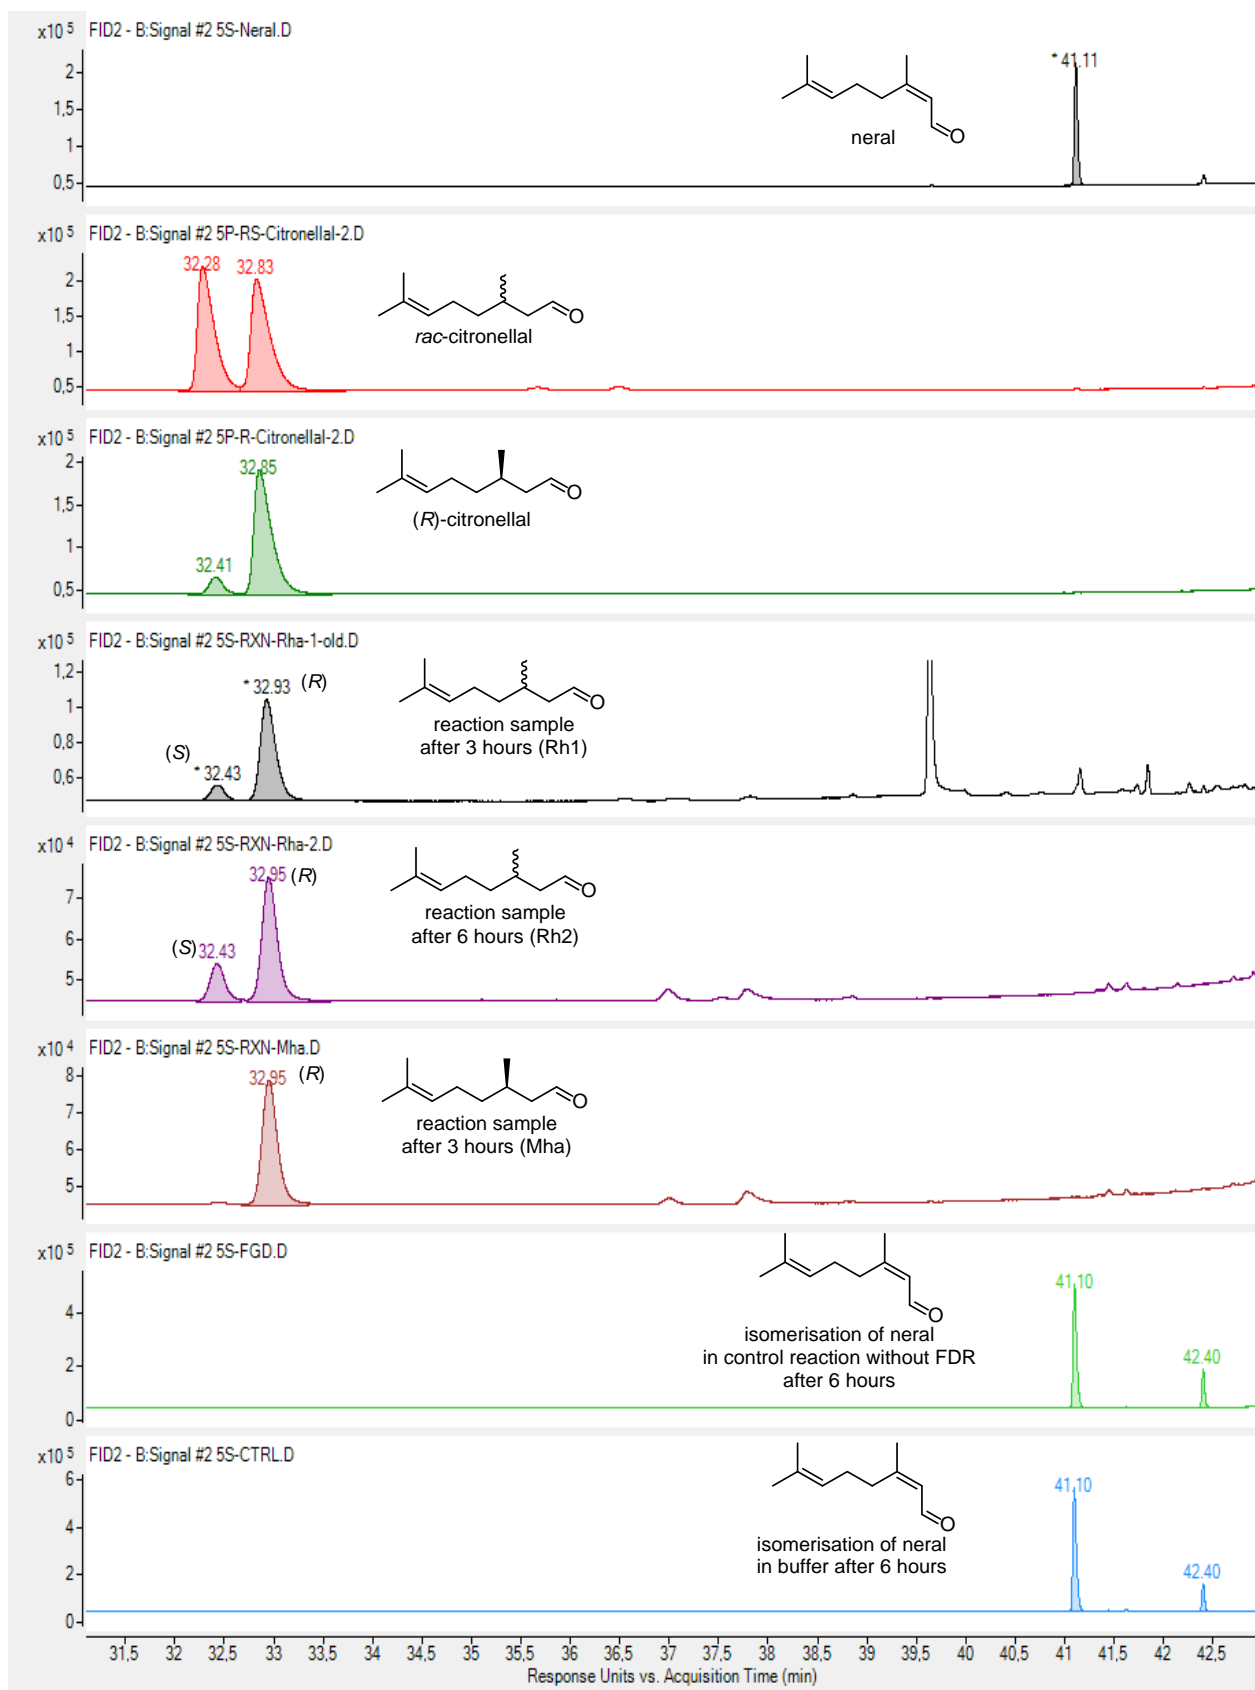

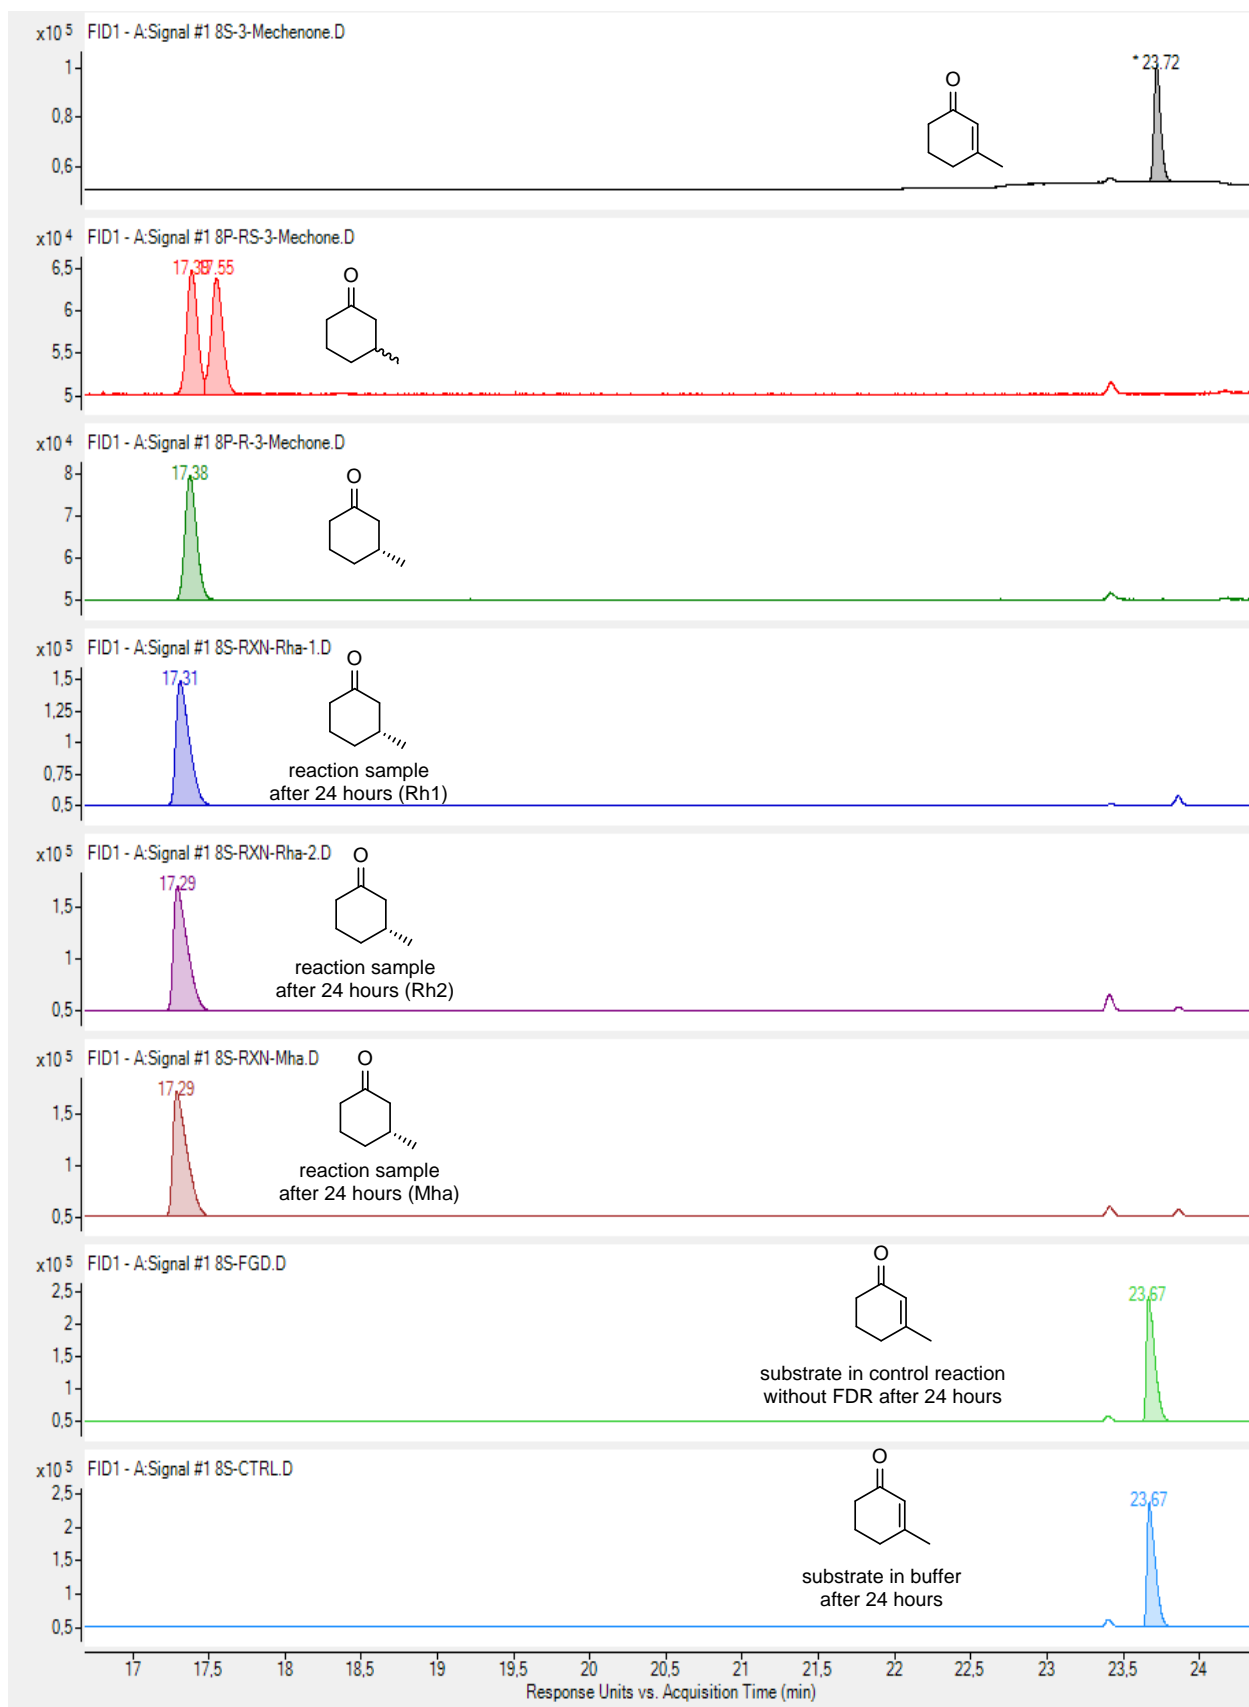

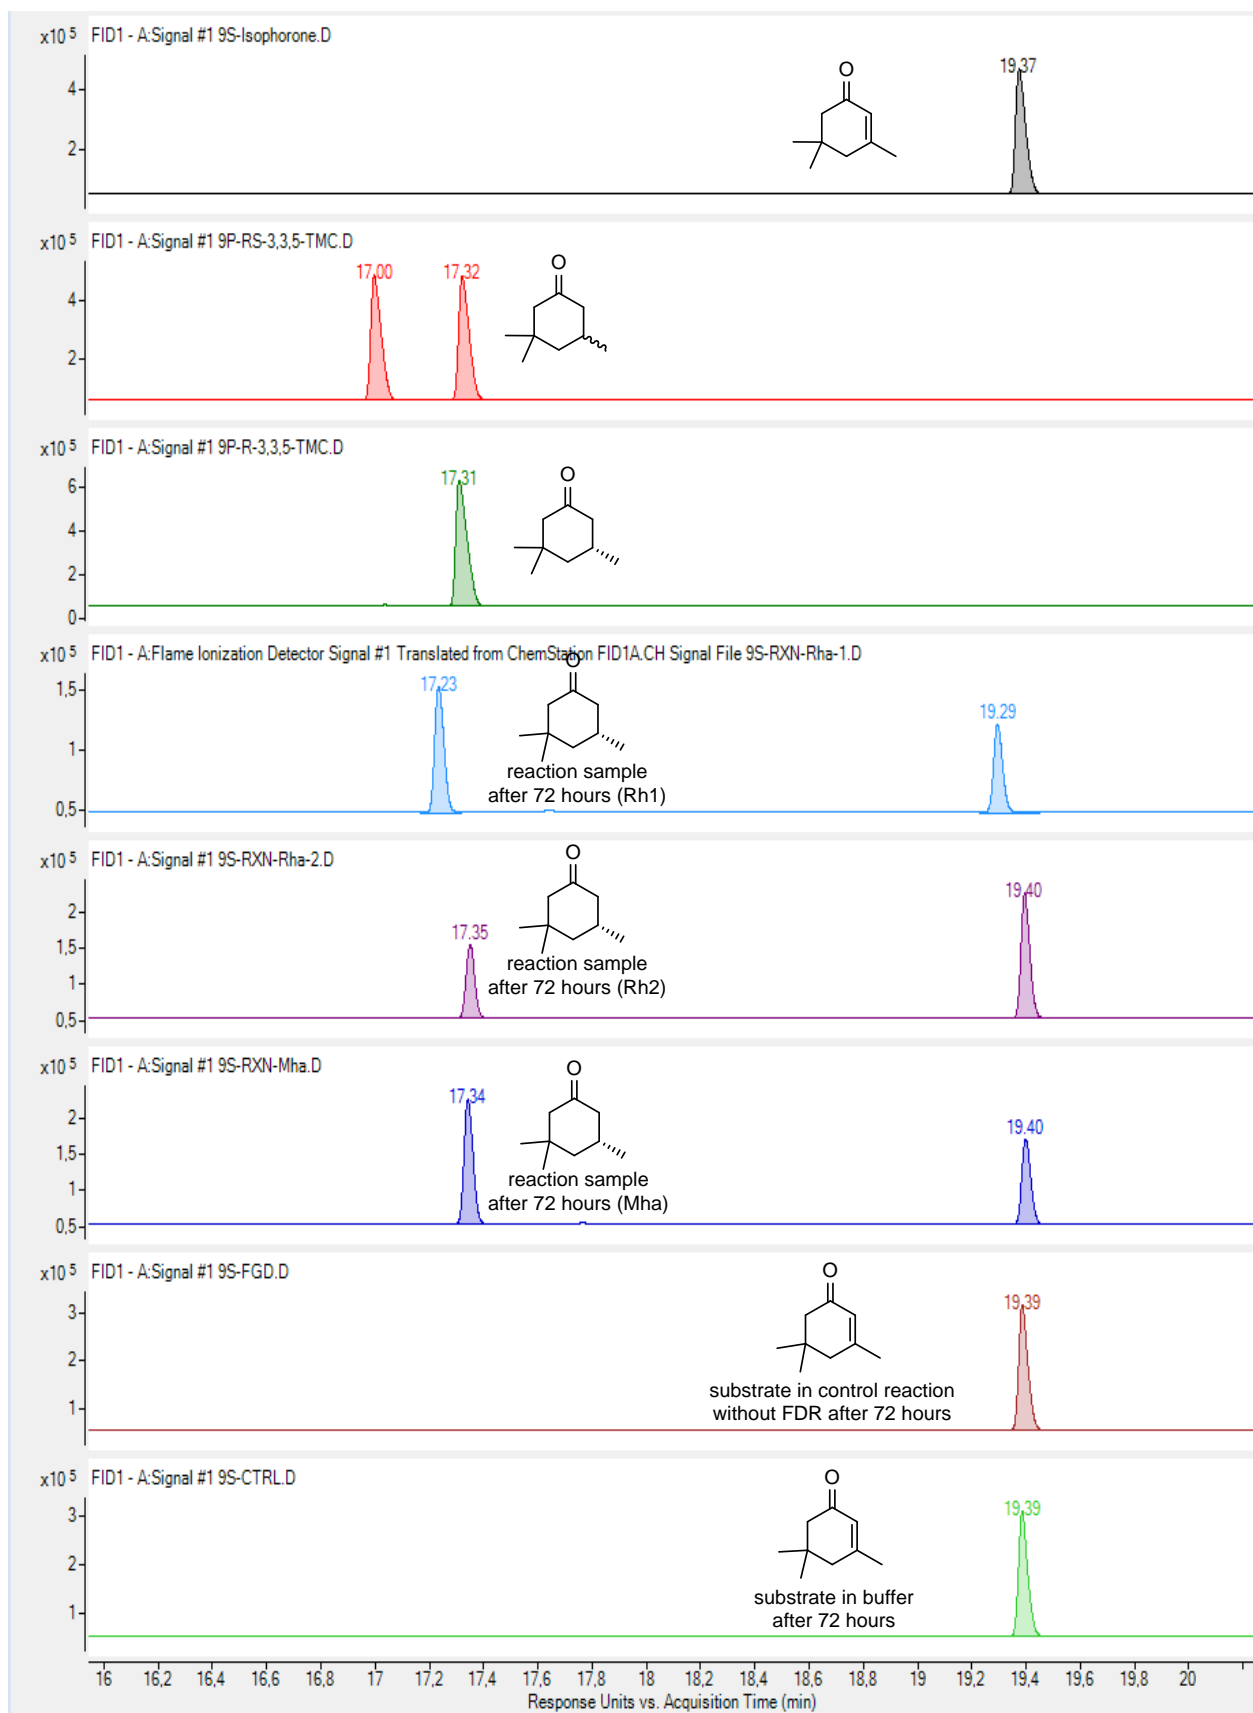



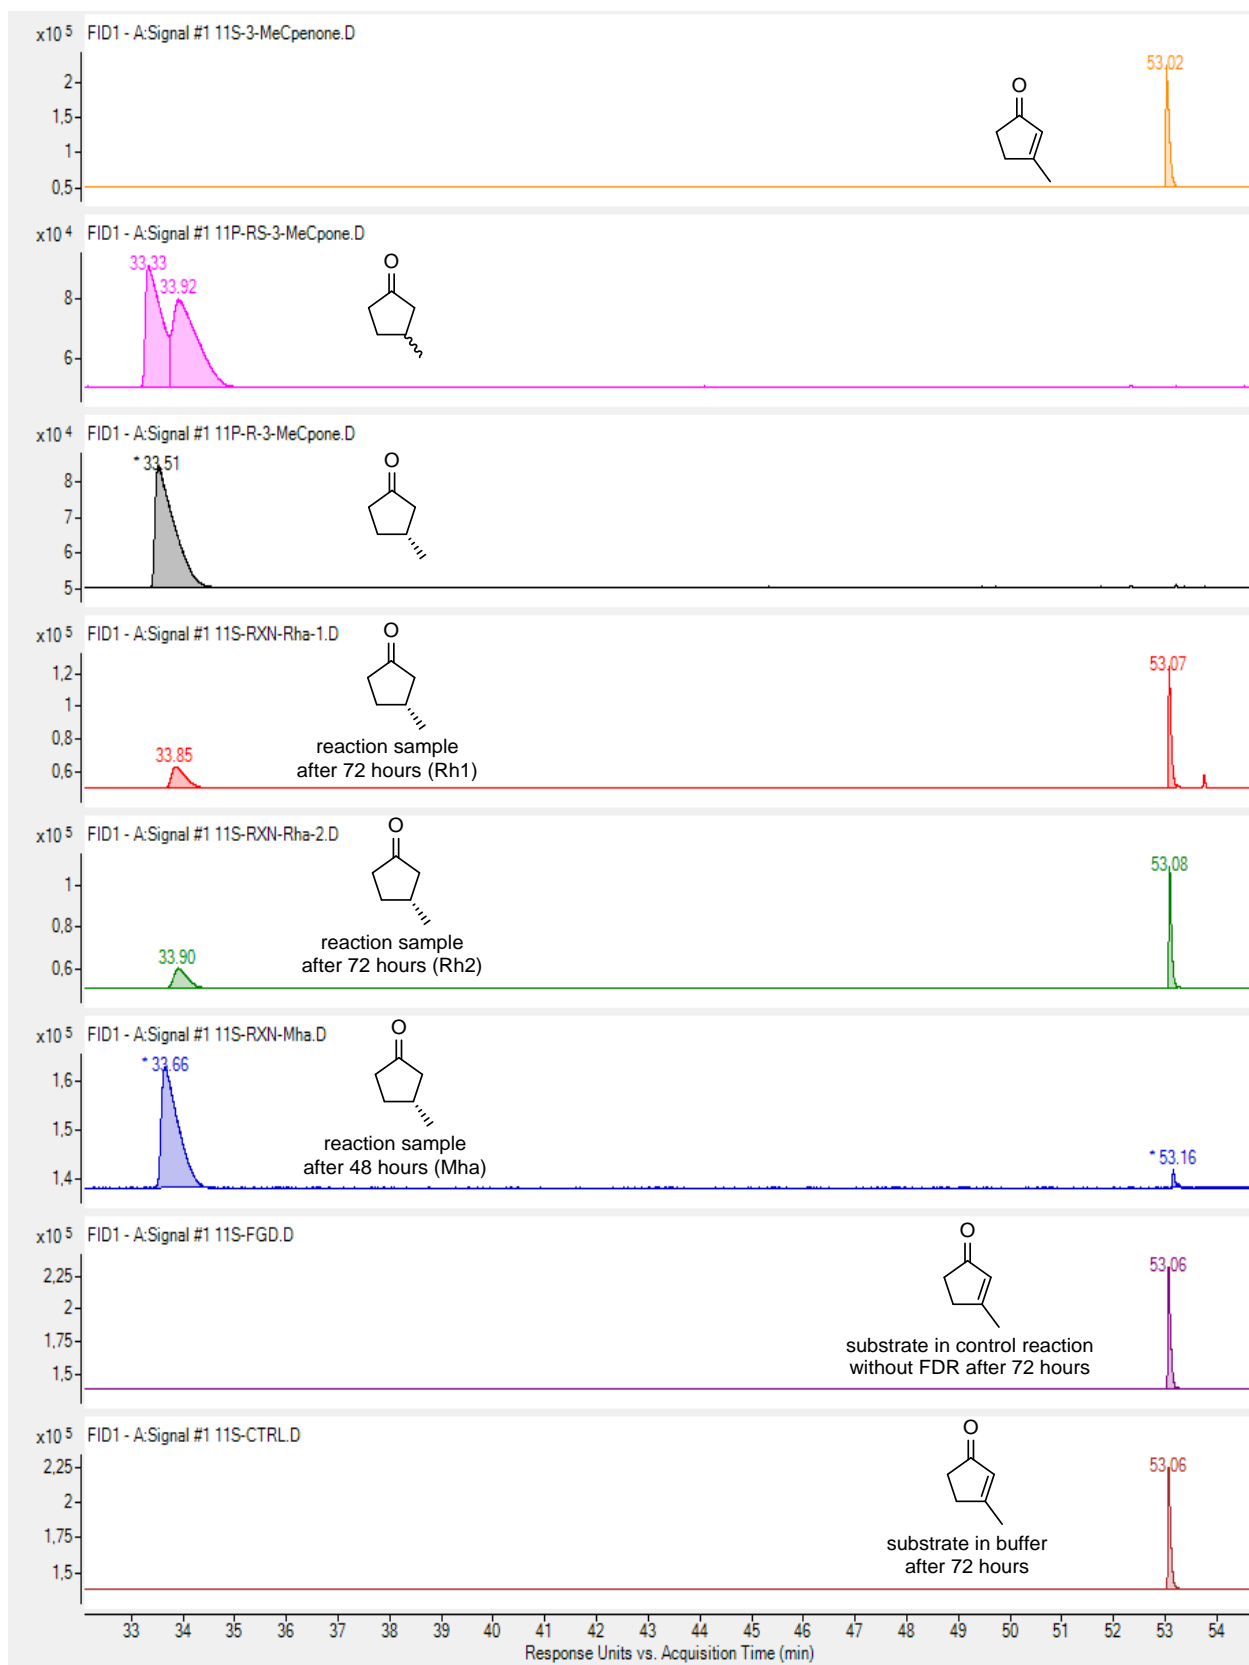

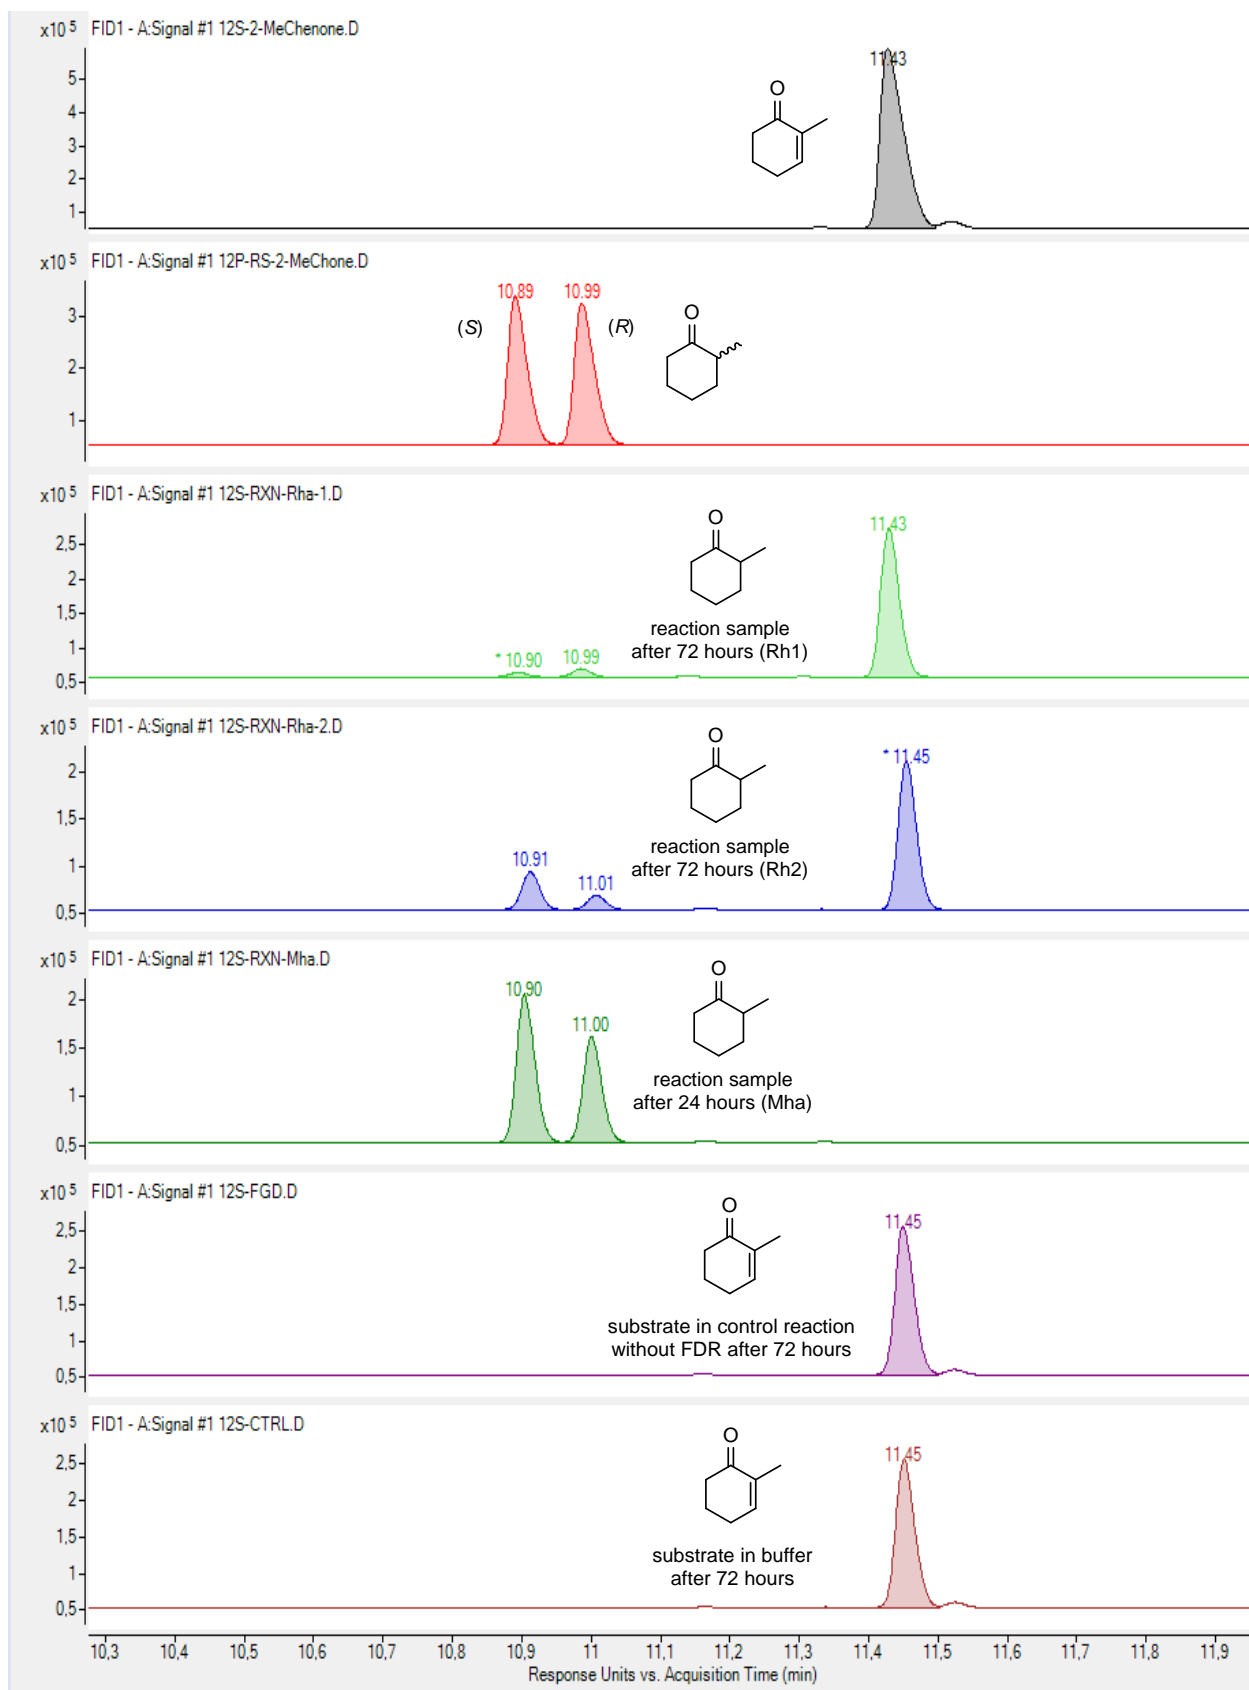

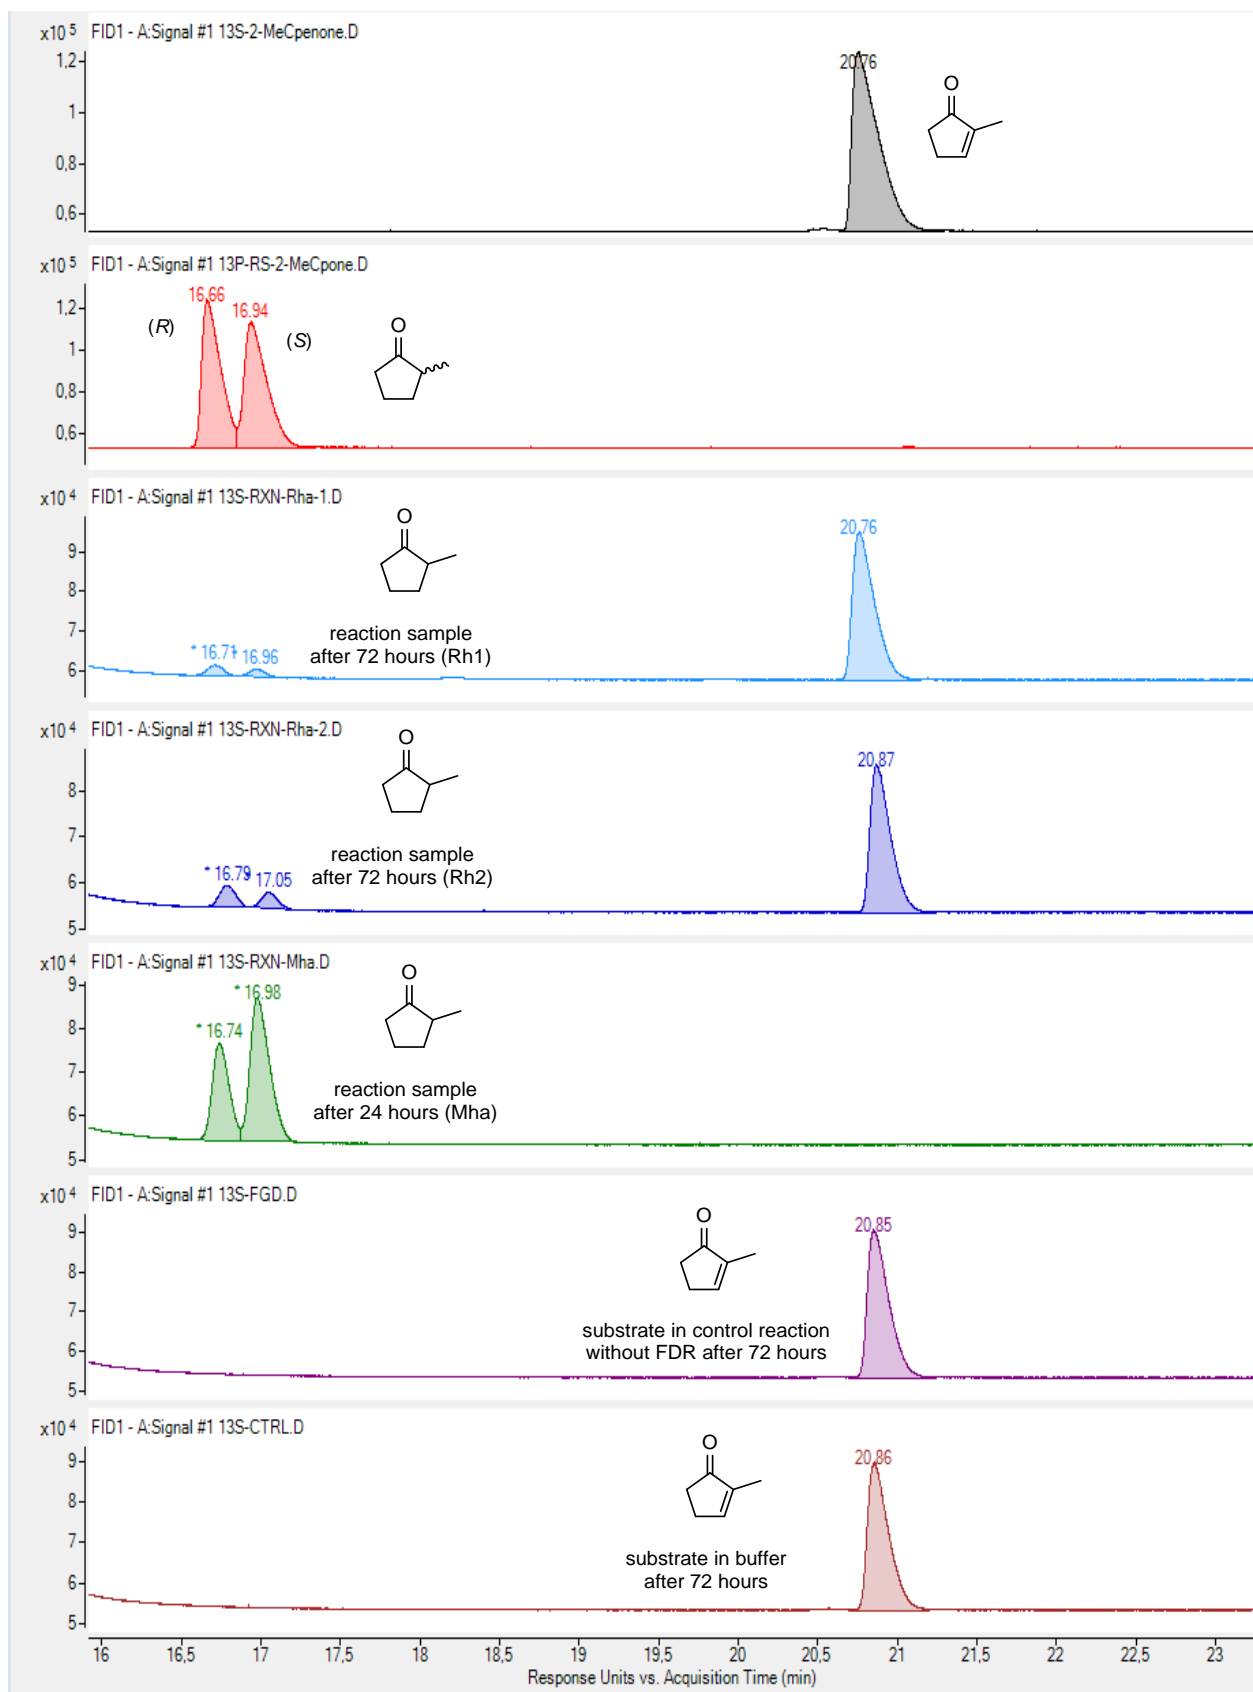

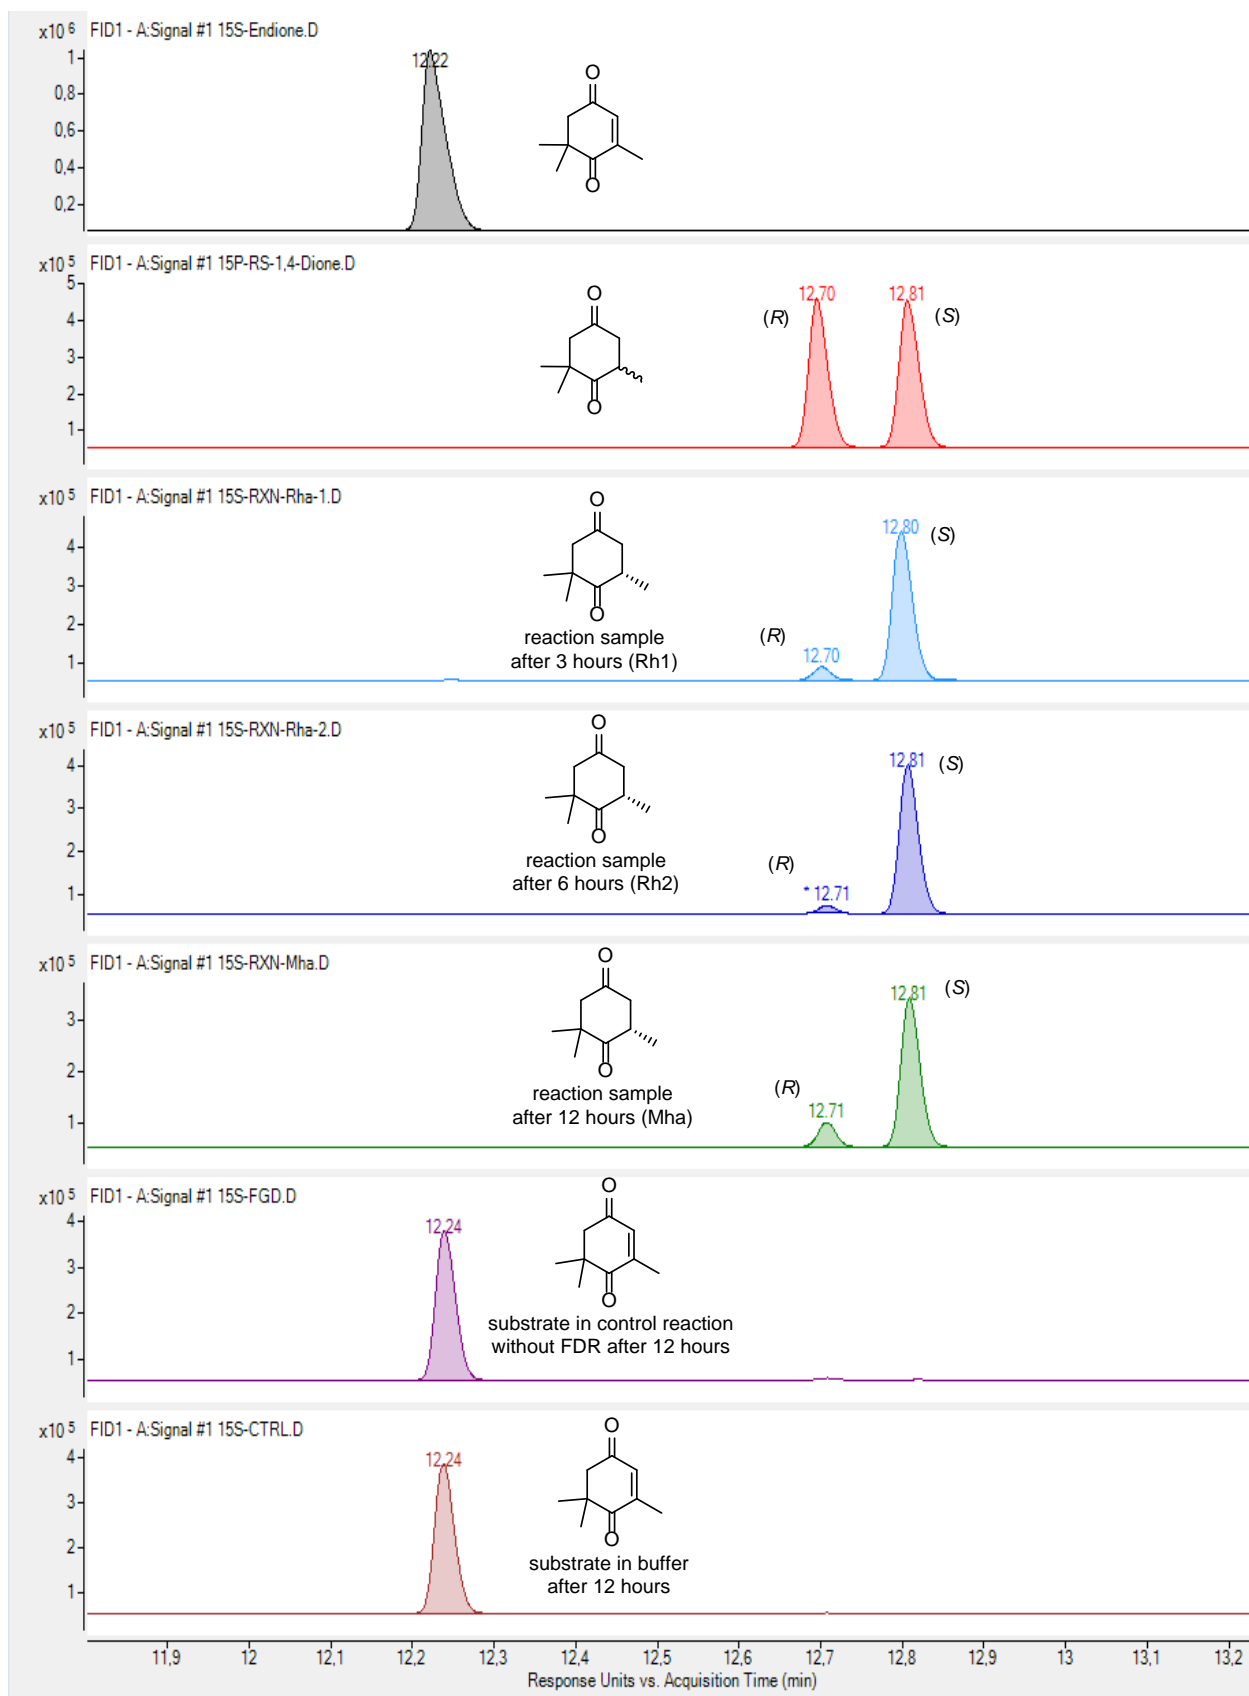

# NMR spectra

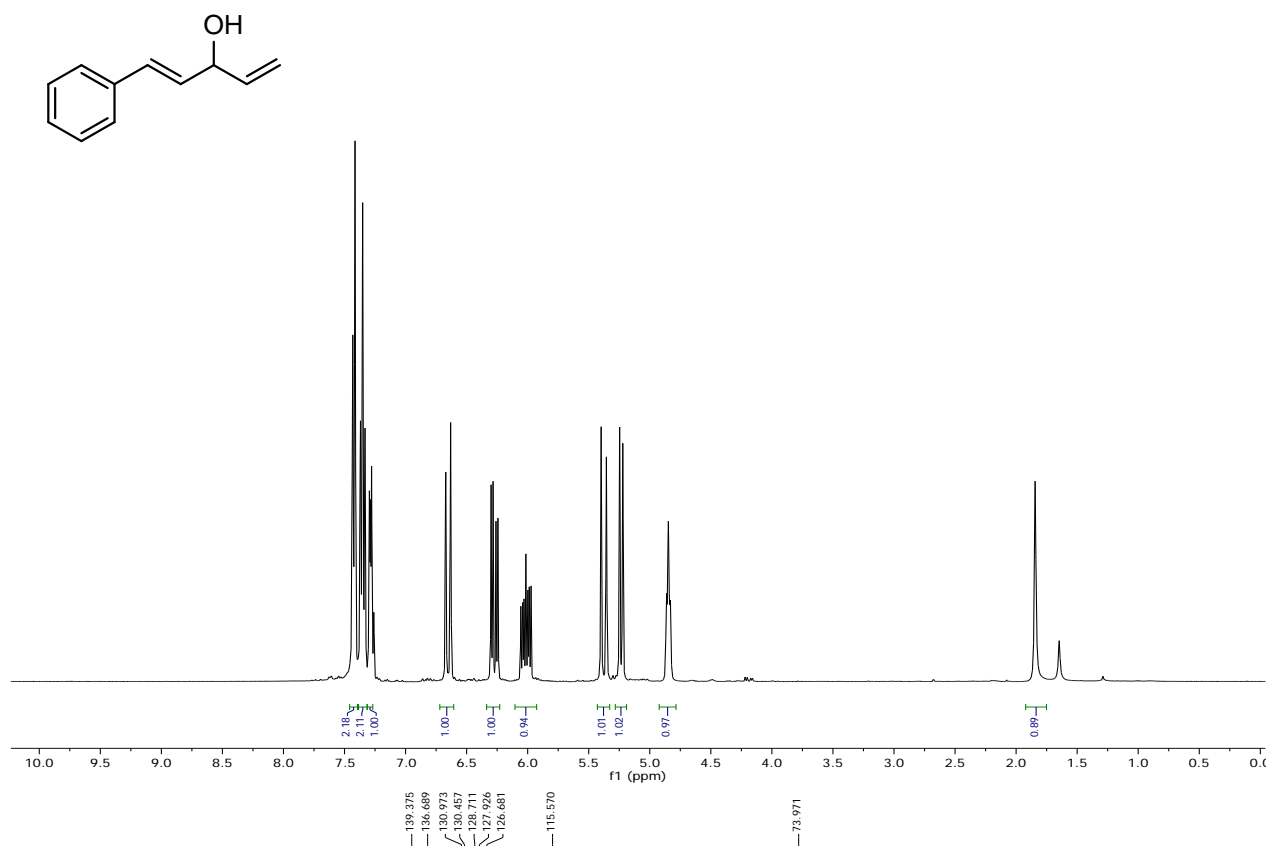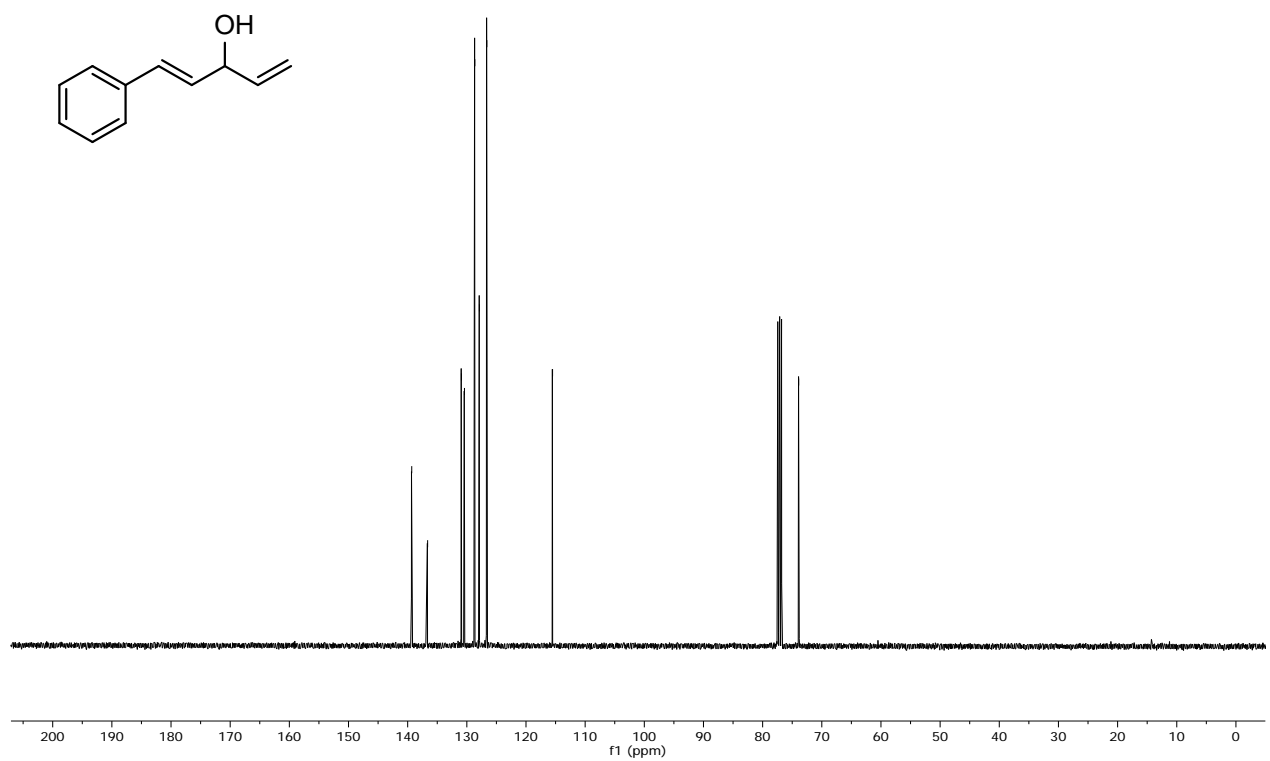

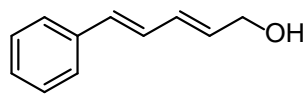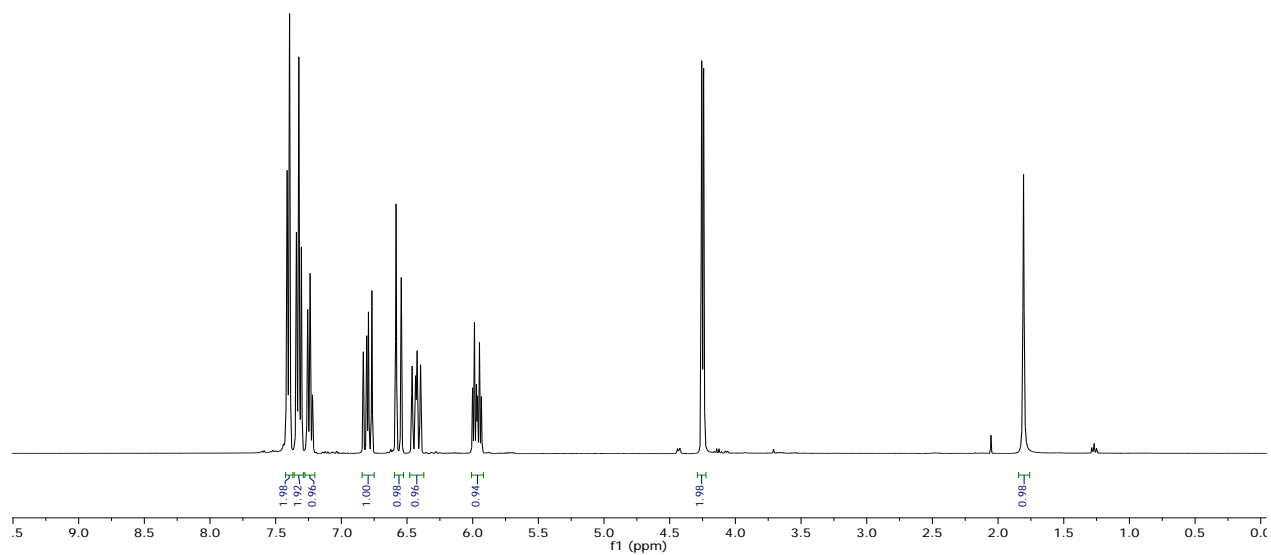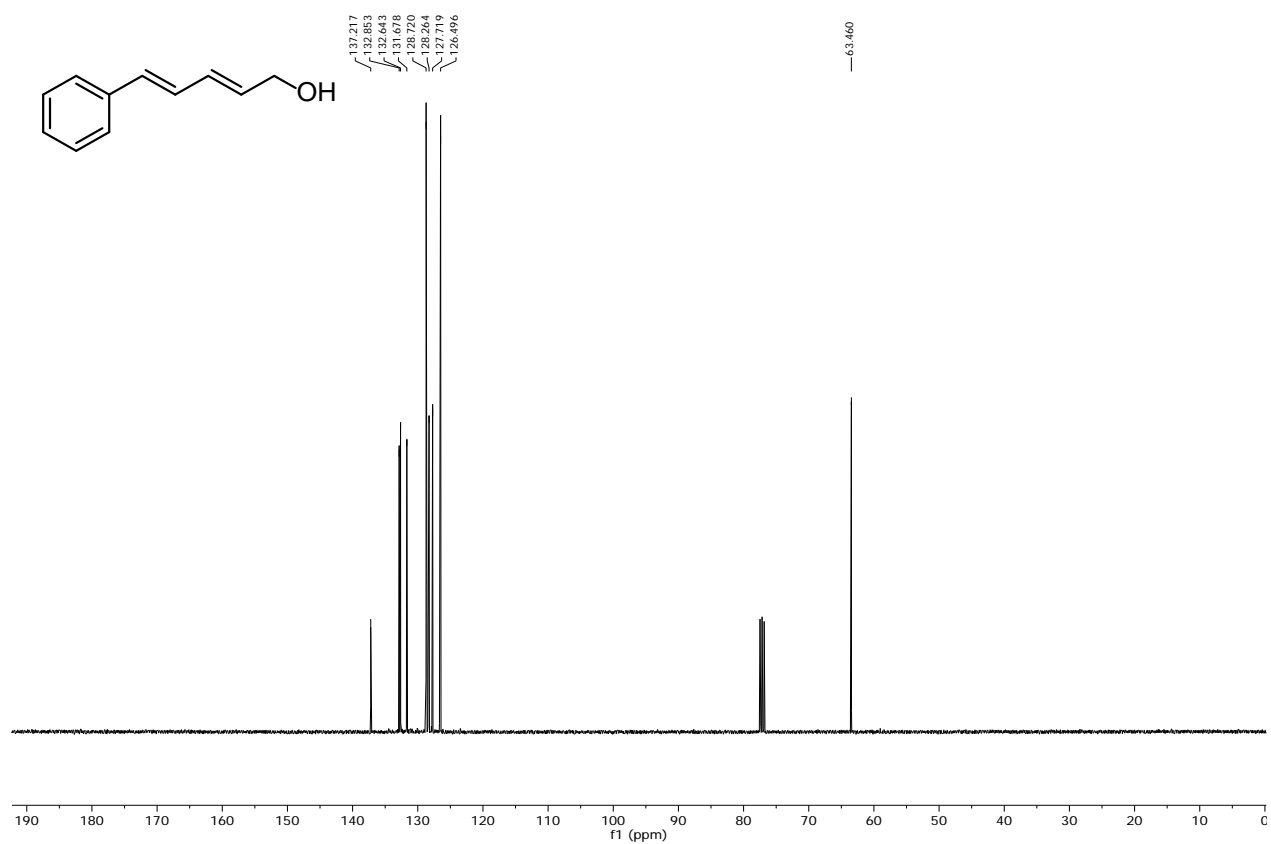

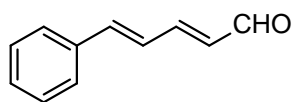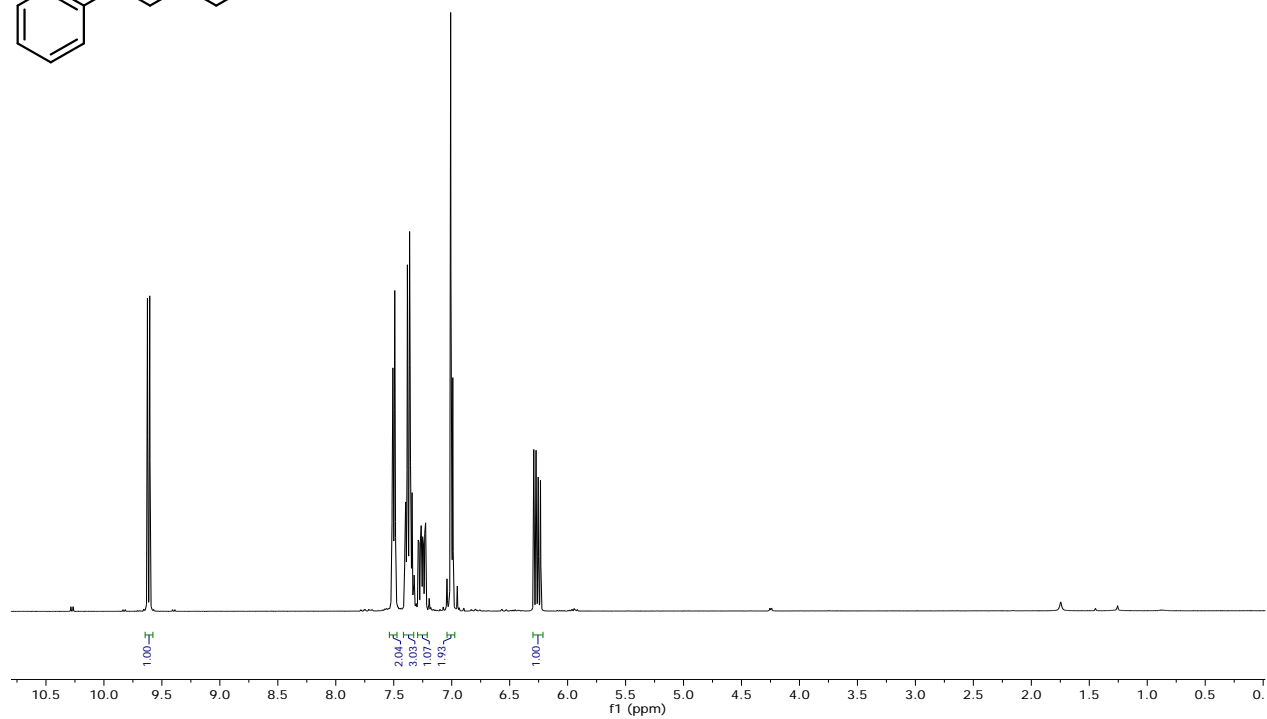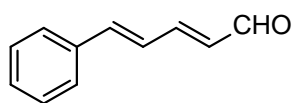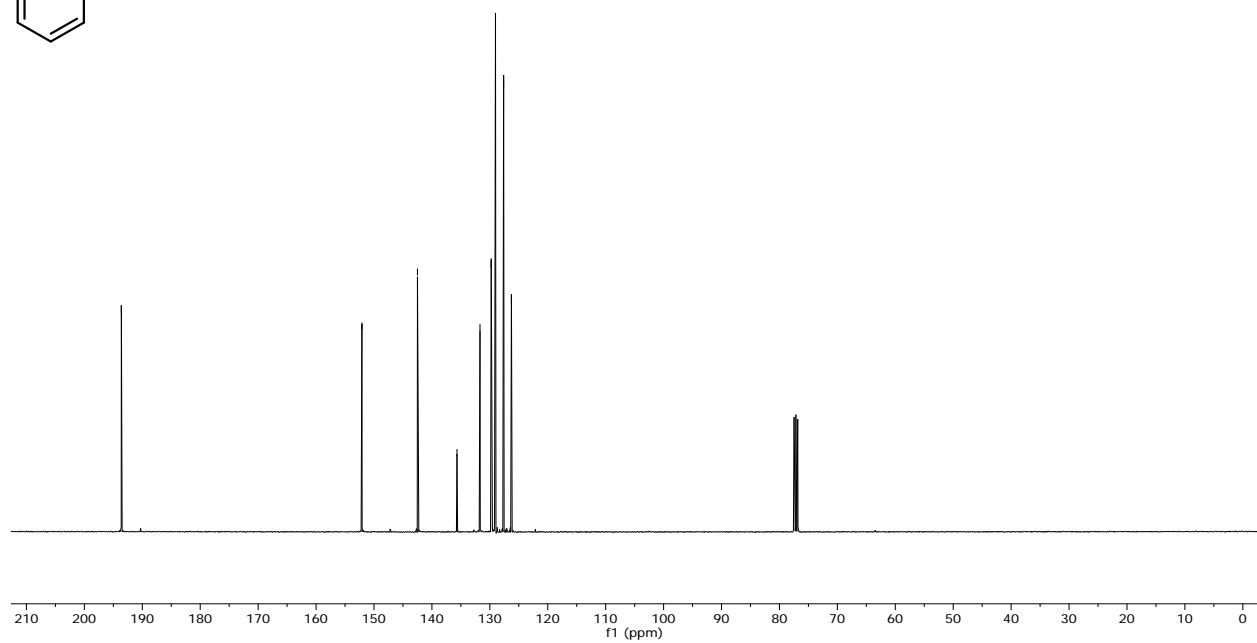

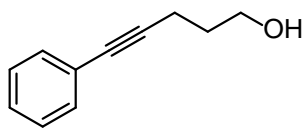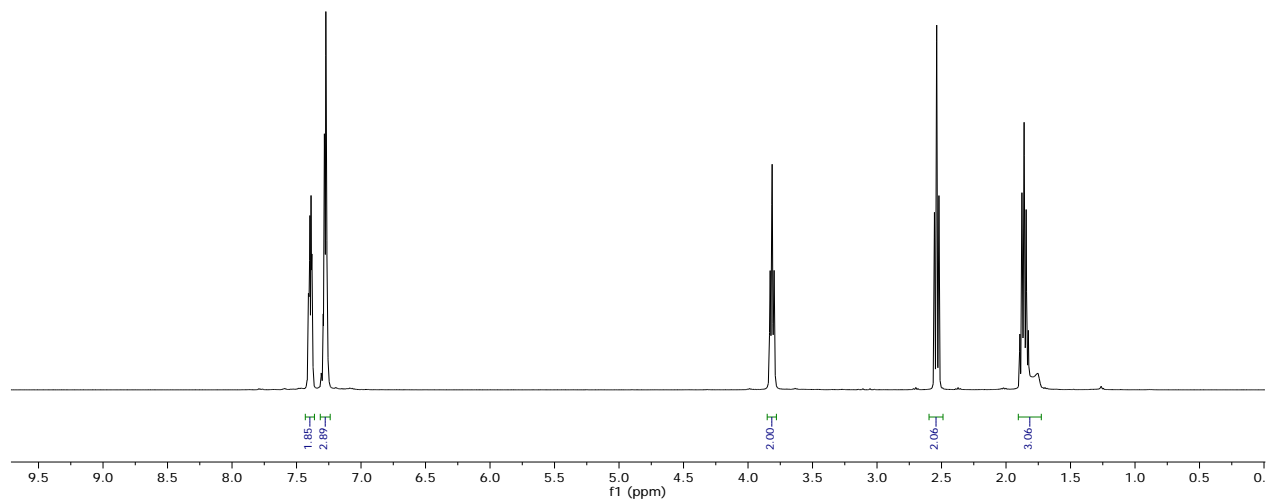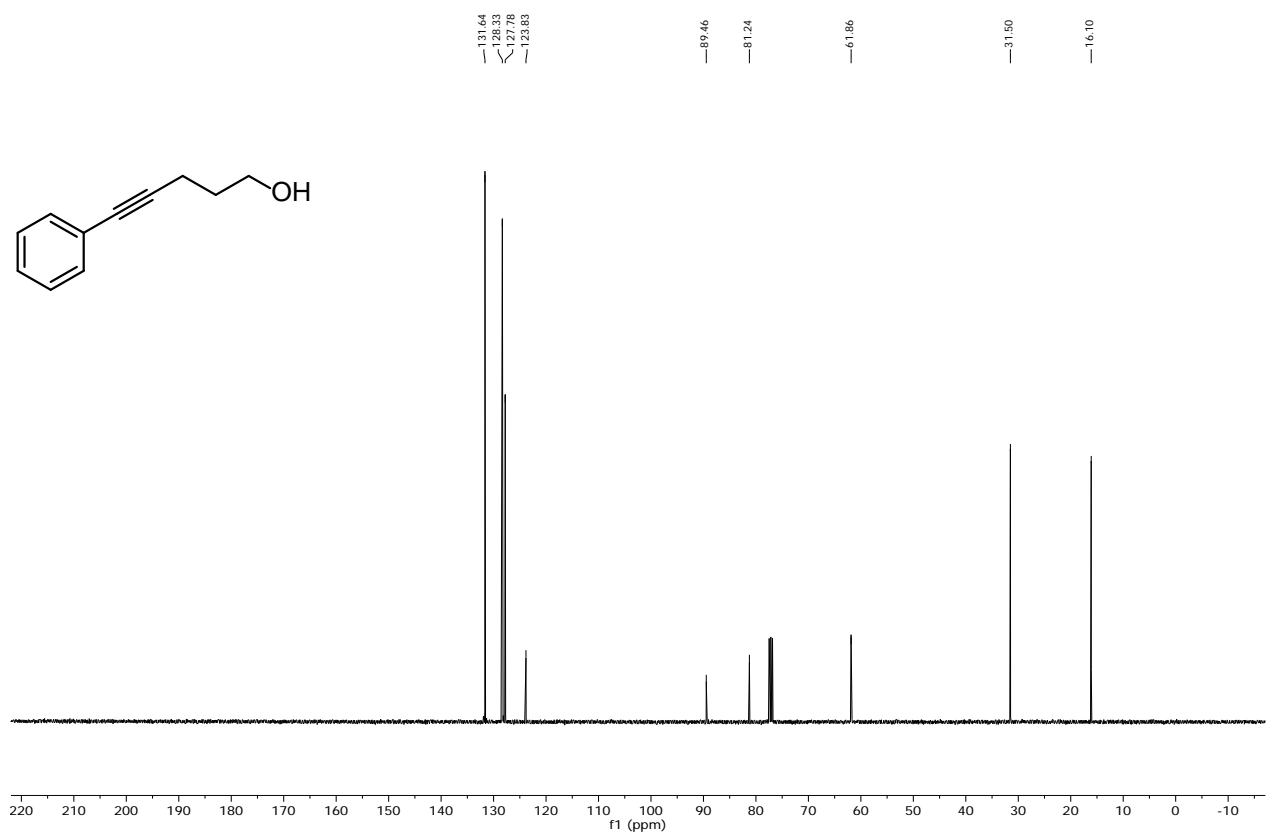



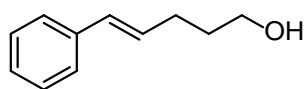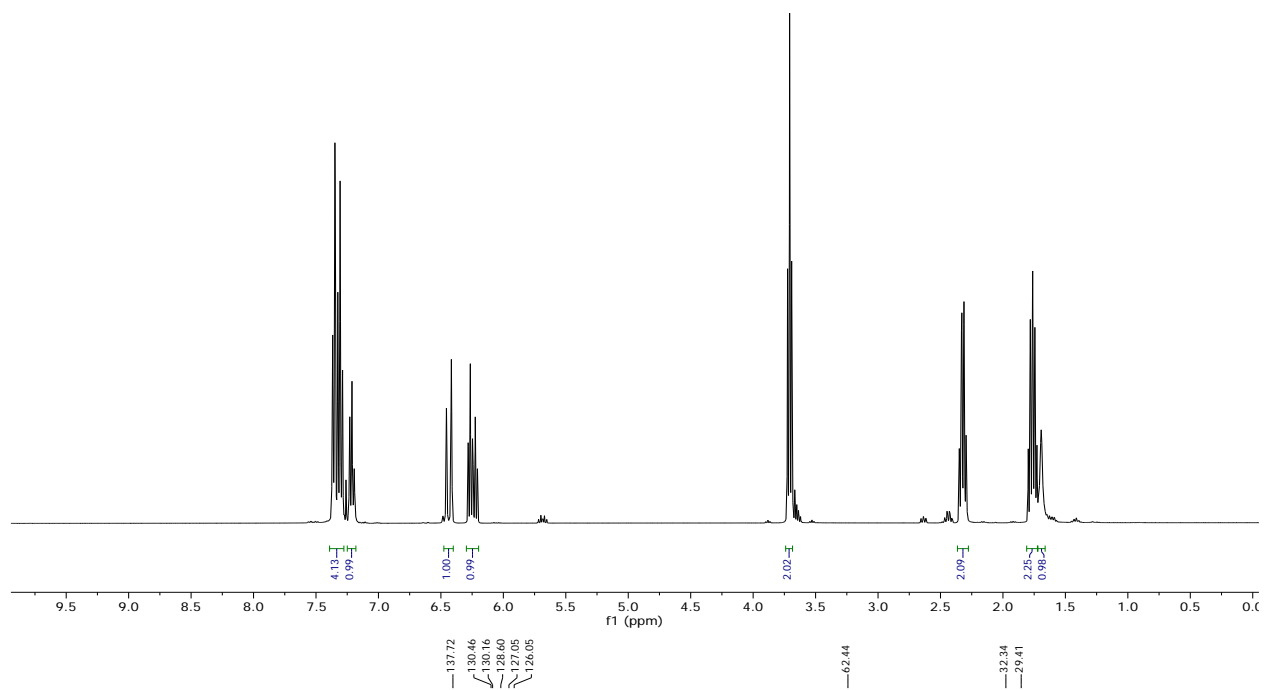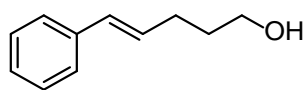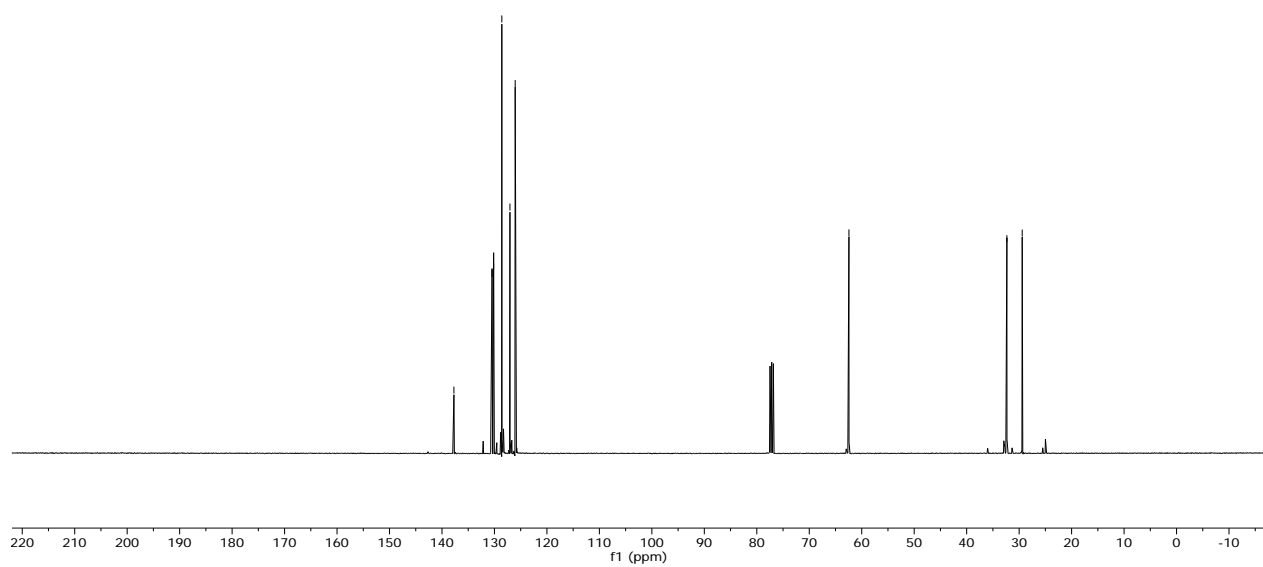

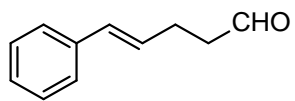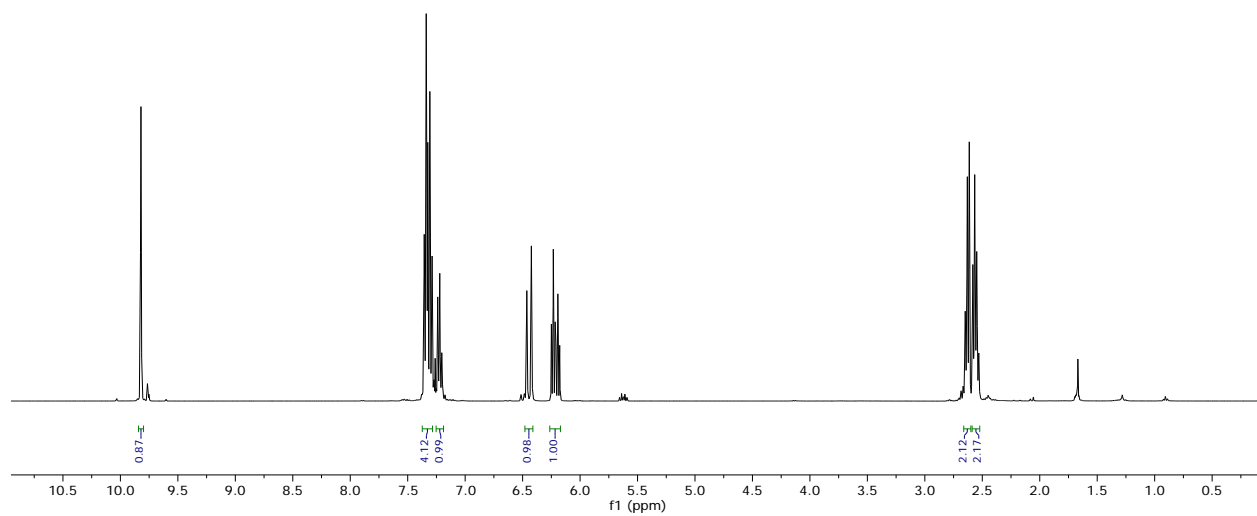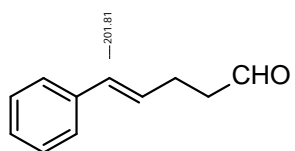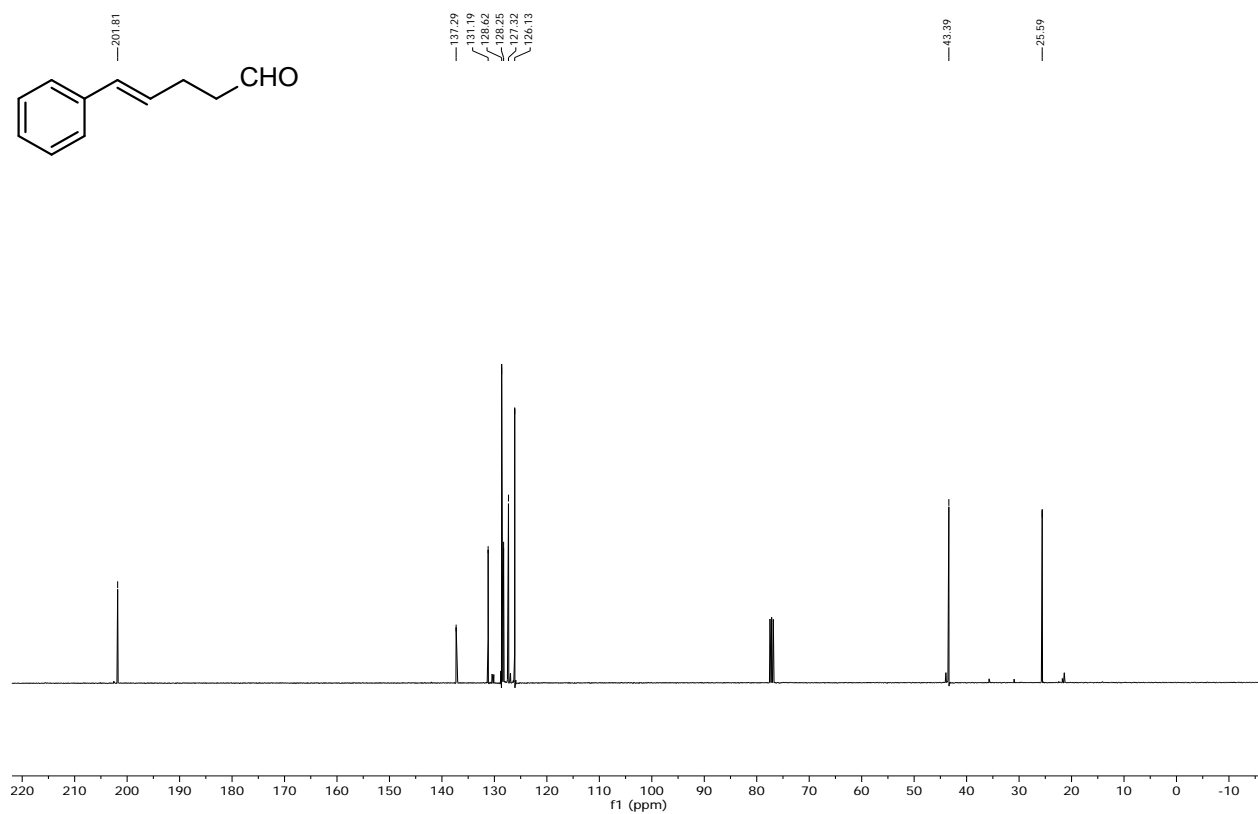

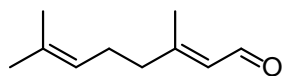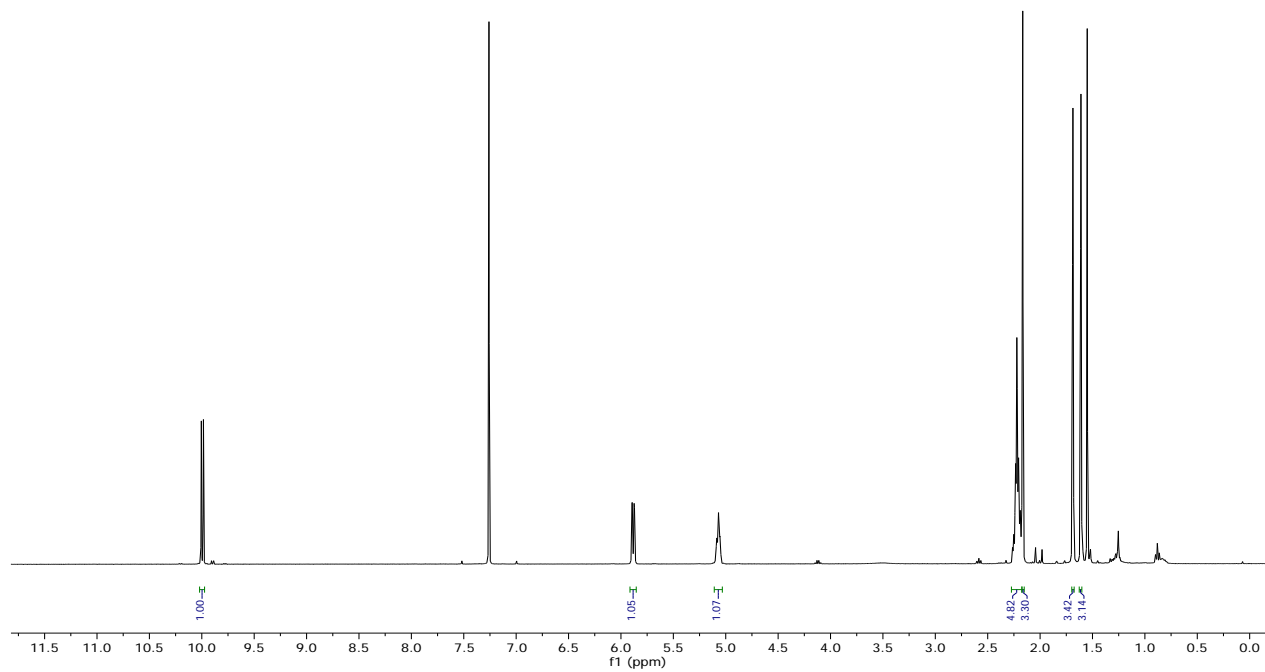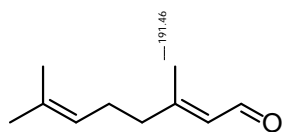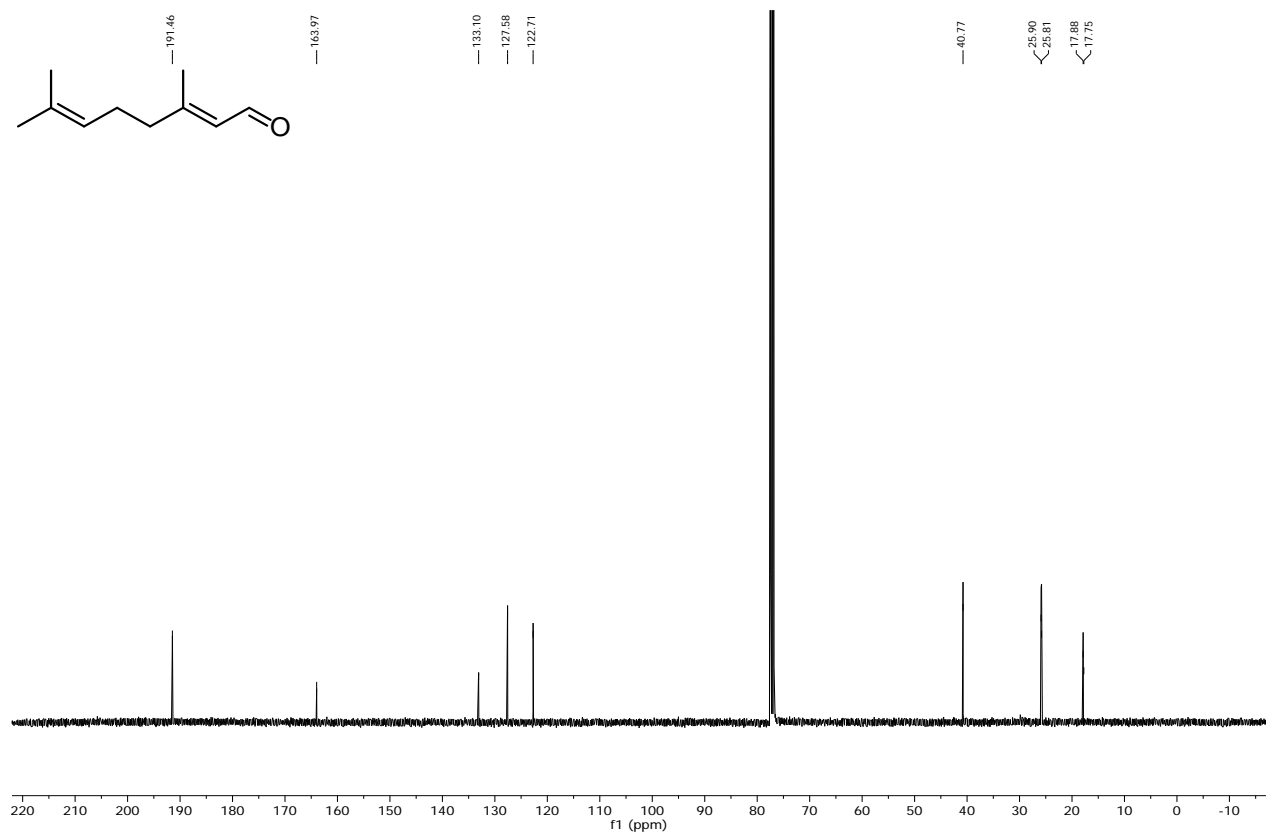

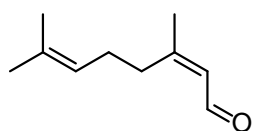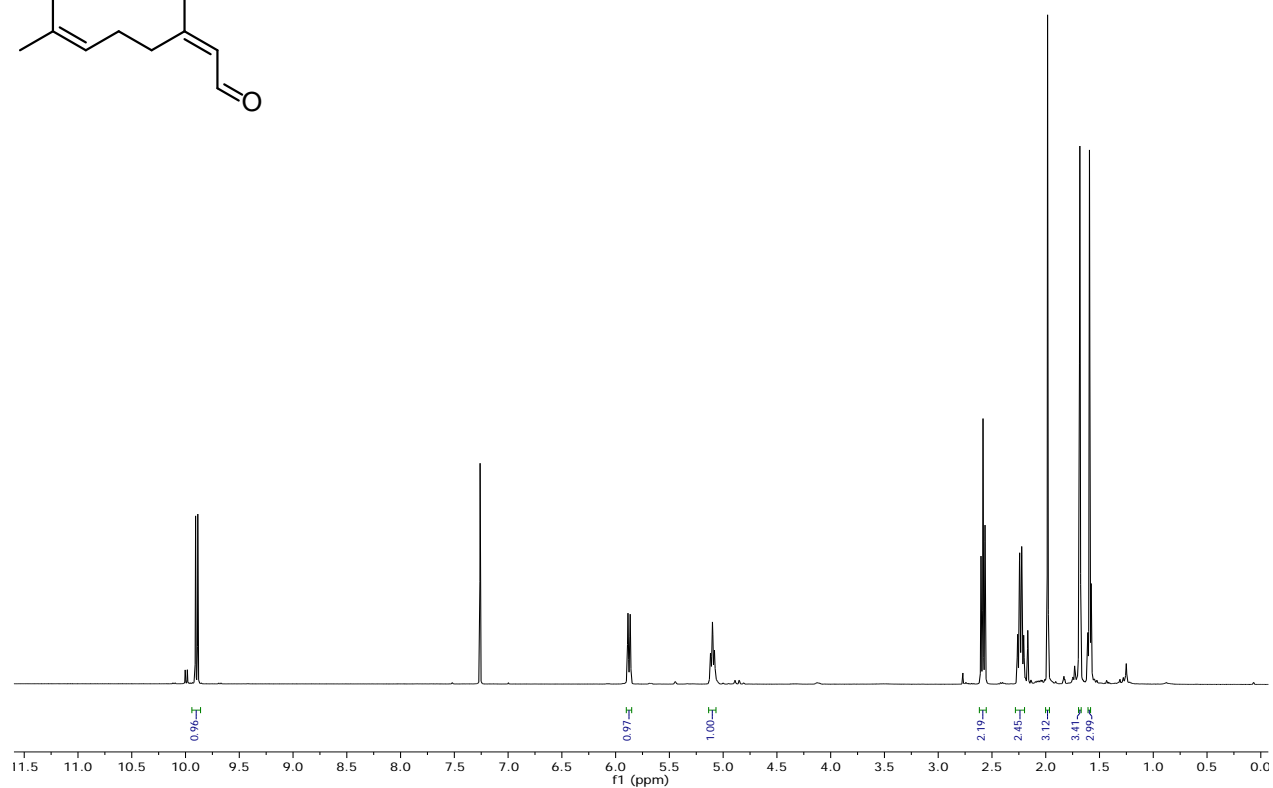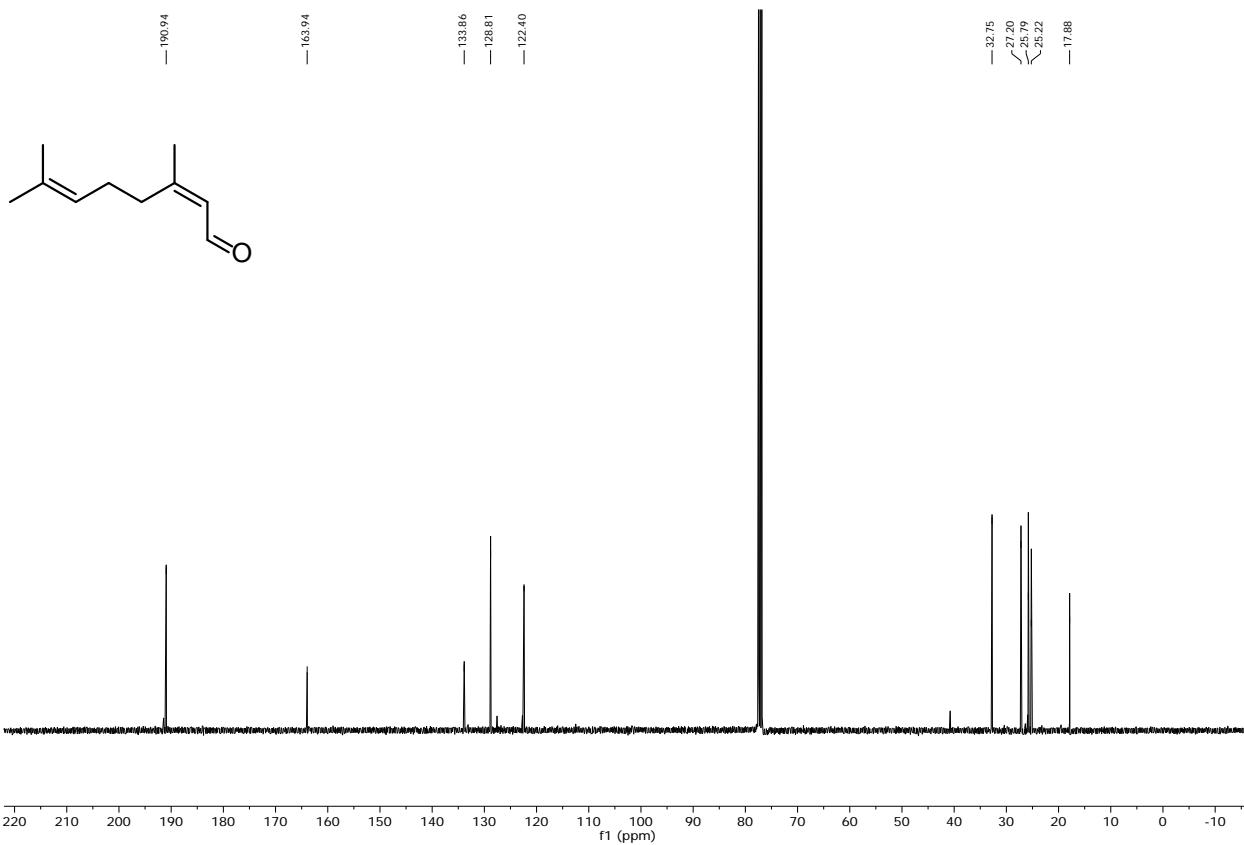

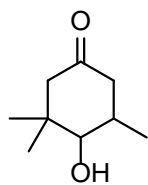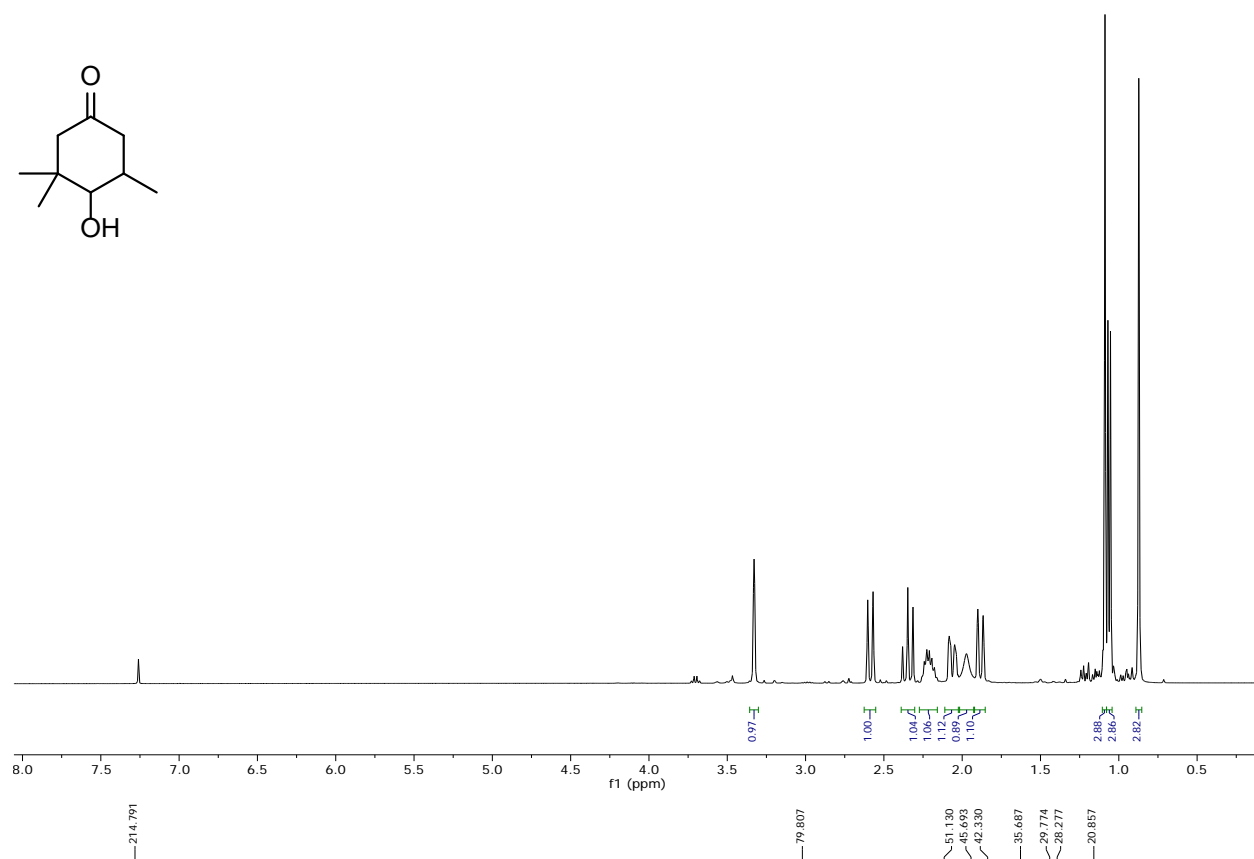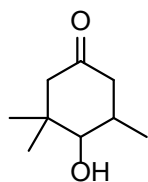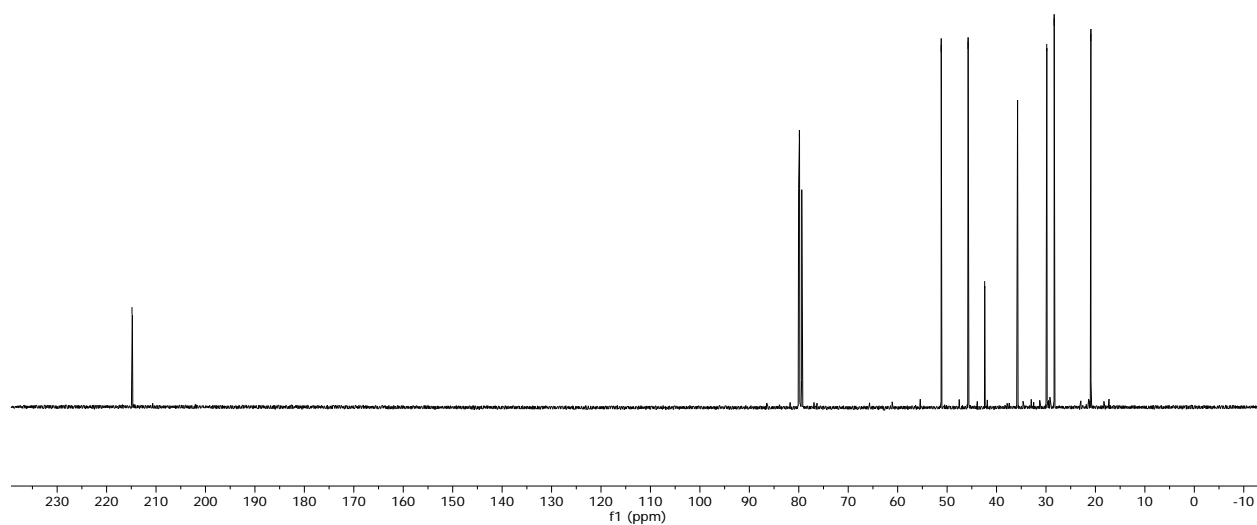

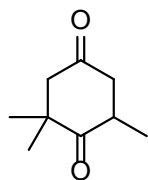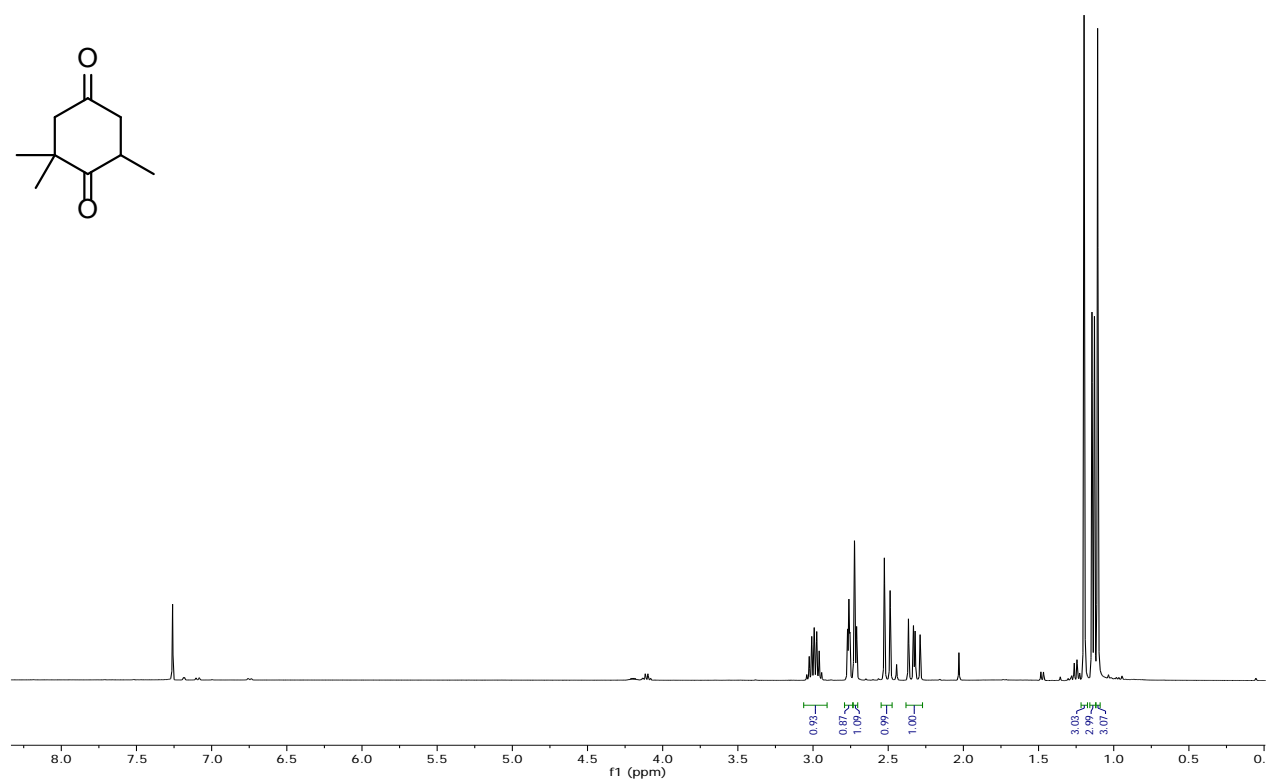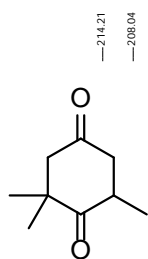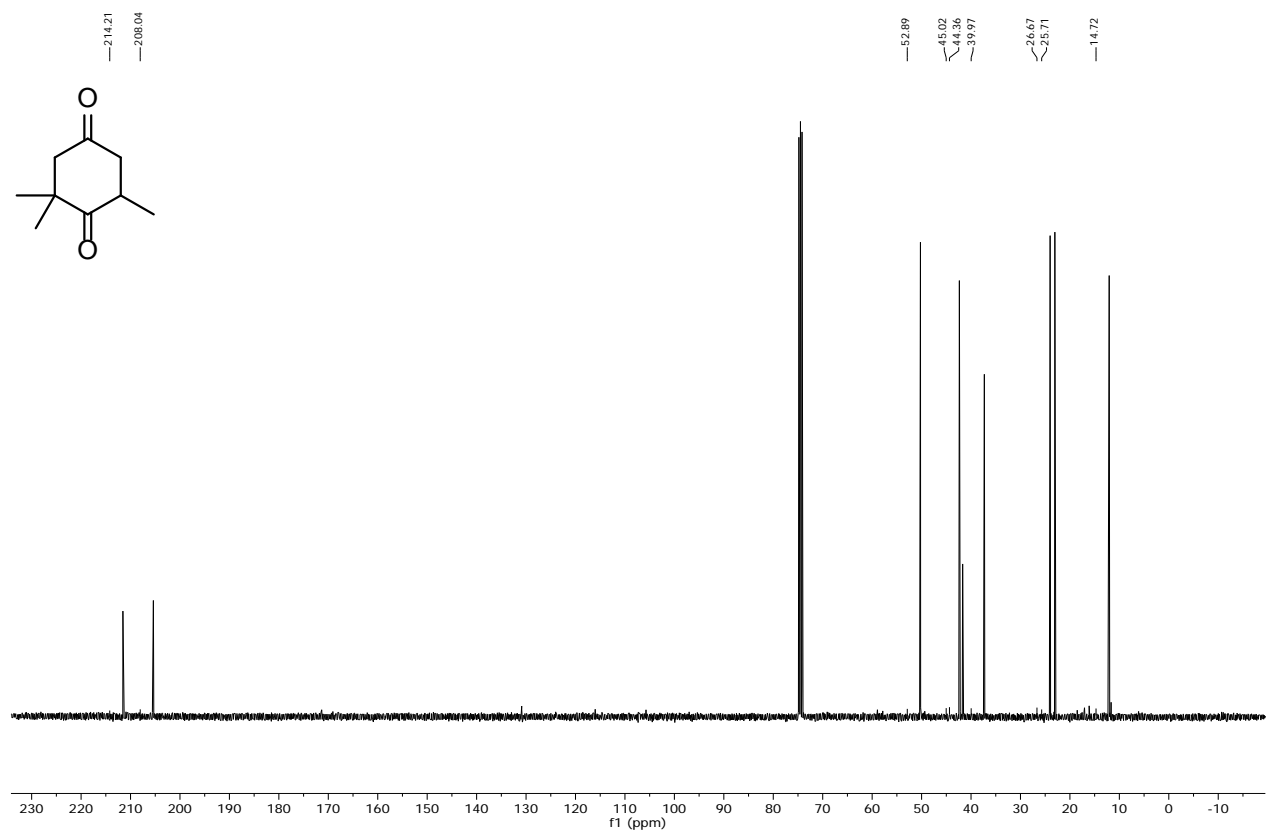

## Homology model of FDR-Rh1

The structural homology model of FDR-Rh1 was built using the crystal structure of the F<sub>420</sub>-complexed Ddn deazaflavin-dependent nitroreductase from *Nocardia farcinica* (PDB:3R5Z, 40% sequence identity with FDR-Rh1). For building the homology model, the Phyre<sup>2</sup> server (Protein Homology/analogY Recognition Engine V 2.0) was used in the default mode using the protein sequence of FDR-Rh1 (<http://www.sbg.bio.ic.ac.uk/phyre2>).<sup>12</sup> For visualization, PyMol was used. The F<sub>420</sub> cofactor, as bound to the Ddn, was superimposed in the FDR-Rh1 structural model.

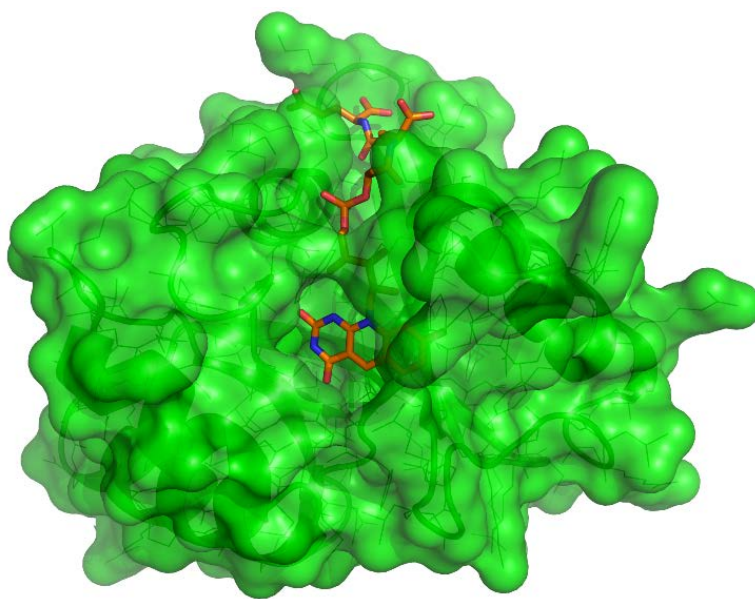

**Fig. S6.** Structural model of F<sub>420</sub>-complexed FDR-Rh1 with the F<sub>420</sub> cofactor in orange (C atoms).

## References

- <sup>1</sup> Nguyen, Q-T.; Trinco, G.; Binda, C.; Mattevi, A.; Fraaije, M. W. *Appl. Microbiol. Biotechnol.* **2017**, *101*, 2831
- <sup>2</sup> Singh, R.; Manjunatha, U.; Boshoff H. I.; Ha H. I.; Niyomrattanakit, P.; Ledwidge R.; Dowd, C. S.; Lee, I. Y.; Kim, P.; Zhang, L.; Kang, S.; Keller, T. H.; Jiricek, J.; Barry, C. E. *Science*. **2008**, *322*, 1392.
- <sup>3</sup> Li, P.-F.; Wang, H.-L.; Qu, J. *J. Org. Chem.* **2014**, *79*, 3955.
- <sup>4</sup> Ferrand, L.; Tang, Y.; Aubert, C.; Fensterbank, L.; Mouriès-Mansuy, V.; Petit, M.; Amatore, M. *Org. Lett.* **2017**, *19*, 2062.
- <sup>5</sup> Jana, R.; Tunge, J. A. *J. Org. Chem.*, **2011**, *76*, 8376.
- <sup>6</sup> Joung, S.; Kim, R.; Lee, H.-Y. *Org. Lett.* **2017**, *19*, 3903.
- <sup>7</sup> Piancatelli, G.; Leonelli, F. *Org. Synth.* **2006**, *83*, 18.
- <sup>8</sup> Doherty, S.; Knight, J. G.; Backhouse, T.; Abood, E.; Alshaikh, H.; Fairlamb, I. J. S.; Bourne, R. A.; Chamberlain, T. W.; Stones, R. *Green Chem.* **2017**, *19*, 1635.
- <sup>9</sup> Okamoto, Y.; Köhler, V.; Paul, C. E.; Hollmann, F.; Ward, T. R. *ACS Catal.* **2016**, *6*, 3553.

- 
- <sup>10</sup> Paul, C. E.; Gargiulo, S.; Opperman, D. J.; Lavandera, I.; Gotor-Fernández, V.; Gotor, V.; Taglieber, A.; Arends, I. W. C. E.; Hollmann, F. *Org. Lett.* **2013**, *15*, 180.
- <sup>11</sup> Steinkellner, G.; Gruber, C. C.; Pavkov-Keller, T.; Binter, A.; Steiner, K.; Winkler, C.; Łyskowski, A.; Schwamberger, O.; Oberer, M.; Schwab, H.; Faber, K.; Macheroux, P.; Gruber, K. *Nature Communications*, **2014**, *5*, 4150.
- <sup>12</sup> Kelley, L.A.; Mezulis, S.; Yates, C.M.; Wass, M.N.; Sternberg, M.J. *Nature Protocols* **2015**, *10*, 845.
